# Supplementary material
Source: PubMed Central journal article supplement (PMC4084479)
Supplement: 1321082111_pnas.1321082111.sapp.pdf [file 1321082111_pnas.1321082111.sapp.pdf]

# Supporting Information

for

## Organic chemicals jeopardize the health of freshwater ecosystems on the continental scale

Egina Malaj<sup>a,b,1</sup>, Peter C. von der Ohe<sup>a,c</sup>, Matthias Grote<sup>d</sup>, Ralph Kühne<sup>e</sup>, Cédric P. Mondy<sup>f</sup>, Philippe Usseglio-Polatera<sup>g</sup>, Werner Brack<sup>a</sup>, and Ralf B. Schäfer<sup>b,1</sup>

<sup>a</sup>Department of Effect-Directed Analysis, Helmholtz Centre for Environmental Research - UFZ, 04318 Leipzig, Germany.

<sup>b</sup>Institute for Environmental Sciences, University of Koblenz-Landau, 76829 Landau, Germany.

<sup>c</sup>Amalex Environmental Solutions, 04103 Leipzig, Germany.

<sup>d</sup>National Hydraulics and Environment Laboratory, Research and Development Division, Electricité de France, 78401 Chatou, France.

<sup>e</sup>Department of Ecological Chemistry, Helmholtz Centre for Environmental Research-UFZ, 04318 Leipzig, Germany.

<sup>f</sup>Department of System Analysis, Integrated Assessment and Modelling, Eawag: Swiss Federal Institute of Aquatic Science and Technology, 8600 Dübendorf, Switzerland.

<sup>g</sup>Interdisciplinary Laboratory for Continental Environments, Centre National de la Recherche Scientifique, Unité Mixte de Recherche 7360, University of Lorraine, 57070 Metz, France.

<sup>1</sup>To whom correspondence may be addressed: [egina.malaj@ufz.de](mailto:egina.malaj@ufz.de) or [schaefer-ralf@uni-landau.de](mailto:schaefer-ralf@uni-landau.de)

### This file includes:

1. SI Methods
2. SI Discussion
3. SI Figures - Figures S1 to S4
4. SI Tables - Tables S1 to S7

**Data deposition:** Datasets and R code are deposited at [https://www.uni-koblenz-landau.de/campus-landau/faculty7/environmental-sciences/landscape-ecology/publications/Malaj/at\\_download/file](https://www.uni-koblenz-landau.de/campus-landau/faculty7/environmental-sciences/landscape-ecology/publications/Malaj/at_download/file)

## 1. SI Methods

### 1.1 Chemical data

Monitoring data for chemical concentrations in the European River Basins were retrieved from the European Environmental Agency (EEA) in July 2012 as part of the Waterbase (version 12) dataset, table *HazSubs* (1). In total, this dataset comprises > 8,200 monitoring sites, covering 34 European countries. Quality control of the reported concentrations was performed following the decision flow chart in Fig. S1, which also provides the number of sites omitted for each step. The dataset was restricted to organic compounds that were identified by the Chemical Abstract Service (CAS) registry number. CAS numbers were checked for consistency and harmonised if necessary. Entries without CAS numbers, which was typically the case when organic compounds are reported as the sum of individual compounds (e.g., PCB congeners), were also removed from the dataset (Fig. S1).

The chemical concentrations were reported in µg/L as mean, minimum and maximum annual values for each monitoring site. The quality control document of the EEA provided guidance on the entries that were problematic, such as entries with missing concentrations or duplicate entries (2) that were consequently removed from the analysis (Fig. S1).

For entries with limit of quantification (LOQ) or limit of detection (LOD) not reported (or reported as zero) the original files submitted by the national authorities to the EEA were checked and, when available, the LOQ was added to the dataset. Otherwise, the entries were omitted. Mean and maximum concentrations above the LOQ (or LOD) were considered as reliable measurements and were included in the analysis. These values were referred to as quantified concentrations. Mean and maximum concentrations below the LOQ (or LOD) were considered as unreliable measurements and were set to zero. These cases were referred to as non-detects. We note that this procedure is likely to underestimate the real exposure.

Analytical measurements, and consequently LOQ/LOD values, are highly dependent on the monitoring programs of the countries and on the laboratories involved. Given that a non-quantified or non-detected chemical is generally reported as equal to or a fraction of the LOQ/LOD value (e.g.,  $\frac{1}{2}$ ,  $\frac{1}{4}$ ; ref. 3), the ratios between the minimum reported concentrations and the LOQ/LOD values usually result in integer values (e.g., 1, 2, 4), which was the case for all countries, except Spain. In the case of Spain, no integer ratios were obtained, thus indicating that the reported LOQ values were incorrect. The error in reported LOQ values was further underpinned by the fact that the LOQ values did not follow the general rule of rounded values (e.g., 0.05 µg/L) but had rather odd entries (e.g., 0.86 µg/L). Moreover, due to several sub-basins in the Spanish dataset, more than one LOQ value was reported for each compound. Therefore, the frequency distribution of all maximum concentrations was calculated for each compound to identify LOQ values empirically. In the case of >3 identical maximum values, these repeatedly occurring values were considered to be LOQ values and, in turn, flagged as non-detects. Due to these considerations, the majority (94 %) of entries for Spain were flagged as non-detects, which was higher than the average of the other countries (81 %). This approach allowed to consider the remaining entries as real maximum concentrations. From this remaining Spanish dataset, 10 entries were removed for the chemical cyanide due to concentration values that were three order of magnitude higher than the mean value found in the other sub-basins.

Geographic coordinates for each site were retrieved from the EEA, Waterbase database, table *Station* (1), which was connected with the *HazSubs* dataset via the unique site identifier *WaterbaseID*. For 148 sites (all in Hungary), the *WaterbaseID* was decapitalised to allow matching. Sites were linked to the river basins of the European Catchments and Rivers Network System database (ECRINS) version 1.0 (4), which defined the river basins as “the area of land from which all surface run-off flows through a sequence of streams, rivers and, possibly, lakes into the sea at a single river mouth, estuary or delta” (see ref. 3, Article 2). A few sites (41) were removed due to missing coordinates or coordinates outside Europe.

Sampling sites were considered as spatially autocorrelated when they were (i) less than 5 km apart from each other and (ii) analyzed in the same year. Sites that exhibited autocorrelation with several other sites were removed, whereas for pairs of autocorrelated sites, we removed one of the sites randomly. This process led to the omission of 532 sites (Fig. S1). Finally, 4,004 sites were available, covering 91 river basins in 27 European countries.

## 1.2 Concentrations for acute and chronic exposure

The number of samples taken in any monitoring program strongly biases the estimation of chronic exposure. To ensure that the mean annual concentration ( $C_{\text{mean}}$ ) was related to multiple detections of a chemical and was not based on a single quantified concentration (i.e., the maximum concentration), we computed a test mean concentration ( $C_t$ ) assuming that all other values were non-detects. As outlined above, in the regulatory context, non-detects were usually set as a fraction of the LOQ/LOD and reported as the minimum, which would consequently influence the reported  $C_{\text{mean}}$  (see ref. 3, Article 5). To check whether the reported  $C_{\text{mean}}$  was determined solely by a single maximum and otherwise minimum annual concentrations ( $C_{\text{min}}$  and  $C_{\text{max}}$ ), we estimated  $C_t$  by:

$$C_t = ((n-1) C_{\text{min}} + C_{\text{max}})/n \quad (1)$$

where  $n$  is the number of measurements for each entry.

A ratio  $C_{\text{mean}}/C_t > 1$  would indicate that  $C_{\text{max}}$  was not the only quantified concentration. However, given that the probability of measuring a compound likely depends on the  $n$ , we checked this relationship for sites with  $> 12$  measurements. For the cases where the  $n$  was  $> 12$  (342 sites) and  $> 24$  (25 sites), we found that 54 % and 60 % of the sites with quantified concentrations had a ratio  $C_{\text{mean}}/C_t > 1$ , respectively. Due to the high uncertainty when drawing conclusions from a small number of sites (e.g., only 5 sites had  $n > 48$ ), we considered  $n > 12$  as the best compromise between the number of measurements and the representativeness in terms of number of sites. The ratio  $C_{\text{mean}}/C_t$  for these sites indicated that at least two quantified values (the maximum annual concentration and another concentration between the maximum and minimum) were used for estimating the reported mean in approximately half of the samples. Thus, the mean can be considered representative for the exposure concentration of at least a few weeks.

However, only 20 % of sites had  $n > 12$ . To remove the dependency of the mean on the LOQ for sites with less frequent sampling (i.e.,  $n \leq 12$ ), we estimated a corrected mean concentration  $C_{\text{c-mean}}$  using the  $C_{\text{max}}/C_{\text{mean}}$  relationship for the sites with  $n > 12$ . The median for this relationship was estimated as approximately three. Thus,  $C_{\text{c-mean}}$  for sites with  $n \leq 12$  was estimated as:

$$C_{\text{c-mean}} = C_{\text{max}}/3 \quad (2)$$

To assess the short-term (acute) exposure, the reported  $C_{\text{max}}$  was used. For 103 cases where this concentration was not reported, the  $C_{\text{mean}}$  was used instead. Although episodic peak exposures were likely to be missed (see above), we considered  $C_{\text{max}}$  as the best approximation of acute exposure in the investigated monitoring programs, especially when considering that several studies have reported a strong relationship between  $C_{\text{max}}$  and ecological effects (5-7).  $C_{\text{max}}$  exhibits a higher analytical precision, as it often strongly exceeds the LOQ. The analytical methods are given in Table S1, and although they were not reported for all compounds, analytical methods for chemical monitoring in Europe are considered to be well established and highly standardised (8). Unless data for only one year were reported, the maximum concentration of each chemical over all years was used to represent the maximum exposure of a site.

## 1.3 Toxicity data

The standard test species used in this analysis (*Pimephales promelas*, *Daphnia magna*, and

*Pseudokirchneriella subcapitata*) were selected because they are (i) standard test species for which a vast amount of experimental toxicity data are available; (ii) representatives of the three major organism groups of vertebrates, invertebrates, and plants; (iii) representatives of three major trophic levels of secondary consumers, primary consumers, and primary producers in freshwater ecosystems; and (iv) considered as relatively sensitive to chemical stressors (9).

The endpoints used were either the LC50 (median lethal concentration) or the EC50 (median effect concentration). The LC50 is the concentration at which 50 % of the test population suffers a lethal response (in the case of fish and invertebrate). The EC50 is the concentration at which 50 % of the population suffers an equivalent effect, i.e., immobility for fish and invertebrate, or inhibition of cellular reproduction by 50 % for primary producers. To improve readability, we refer to all endpoints as the LC50.

Experimental toxicity data were available for 80 % of the compounds for *D. magna* and for 54 % of the compounds for both *P. promelas* and *P. subcapitata* (see Table S1 for sources). Predicted values based on a read-across methodology (10, 11) were used for 15 %, 46 % and 31 % of the compounds for *D. magna*, *P. promelas* and *P. subcapitata*, respectively. Read-across models extrapolate the acute toxicity of non-tested compounds based on the structural similarity of compounds for which the acute toxicity is available. The similarity of two compounds is obtained by comparing the occurrence of identical atom-centred fragments (ACFs; see ref. 10 for details). An algorithm employing ACFs has been developed for the standard test species (10, 11) and the method is fully automated in ChemProp (12). The latter was also used to extract physicochemical parameters of compounds (e.g. water solubility and the octanol-water partitioning coefficient:  $K_{ow}$ ; Table S1). The level of similarity between compounds would establish the reliability of the predicted values, which were classified from very high to low reliability (see ref. 11 for details) and are presented in Table S1. The prediction performance of the read-across models were assessed using a leave-one-out cross validation technique and explained 75-90 % of the variance (10, 11).

For the compounds where the read-across models were not applicable, baseline toxicity was estimated from the compounds'  $\log K_{ow}$  using the species specific quantitative structure-activity relationship (QSAR; 5 % for *D. magna*, and 15 % for *P. subcapitata*; see Table S1 for sources). Baseline toxicity assumes a narcotic mode of action (partitioning into membranes), which is typically regarded as the minimal toxicity of an organic compound (13). Hence, this approach tends to underestimate the true toxicity. If the  $\log K_{ow}$  was outside of the application domain of the baseline predictions ( $1 < \log K_{ow} < 6$ ), then this compound was excluded from the analysis (Table S1; 3 compounds for *P. promelas*, 4 compounds for *D. magna*, and 28 compounds for *P. subcapitata*).

Furthermore, compounds were removed when the respective experimental, predicted or baseline toxicity values were  $\geq 10$ -fold higher (Table S1; 18 compounds for *P. promelas*, 13 compounds for *D. magna*, 15 compounds for *P. subcapitata*). For three active enantiomers (metalaxyl-m, dichlorprop-p, and mecoprop-p) the measured or predicted values for the enantiomer mixtures were used.

Finally, 223 compounds with acute toxicity values for at least one species were used in the analysis, covering 4,001 European sites.

#### 1.4 Threshold selection for the assessment of chemical risk

Chemical concentrations above the acute risk threshold (ART -1/10 of the LC50) are generally recognised to result in acute ecological effects (5, 14, 15). Difficulties arise to estimate the threshold levels for ecological communities exposed to mixtures of chemicals for longer periods at lower concentrations. To our knowledge, there is only one meta-analysis that provides a potential threshold for such effects (5). These studies reported shifts in invertebrate communities towards more tolerant species when exposed to pesticides at 1/1,000 of the *D. magna* LC50

values. Furthermore, a recent study confirmed losses in biodiversity at 1/1,000 of the LC50 values (16). Hence, this value was used as the chronic risk threshold (CRT) for invertebrates. In the absence of similar studies for fish and algae, we used the acute-to-chronic-ratio (ACR) from laboratory data to derive chronic effect thresholds for these organism groups. This method is based on the empirical calculation of the ratio between the acute toxicity data used here (e.g., LC50/EC50 values) and Chronic No Observed Effect Concentration (NOEC) values or Lowest Observed Effect Concentration (LOEC) for the same species and the same compound. Typically, the ACR is a factor of 10 for fish (17-20), while for algae, the ACR is a factor of 4 to 5 (17, 20). Algae ACRs are limited due to insufficient acute data (21). In the absence of field studies, which help in validating laboratory-driven thresholds, it is difficult to assess the magnitude of chronic effects for algae and fish, because (i) the test species used here are most likely not the most sensitive species for all substances consisting of various modes of action, (ii) laboratory chronic studies cover still only a short period compared to potential field exposures and the life cycle of many invertebrates and fish, and (iii) toxicity tests for single species cannot integrate ecological concepts, such as recovery or species interaction and the resulting indirect effects (9, 22-25).

The chronic risk for fish and algae estimated from the ACR-based threshold could be underestimated in our study, if field studies established lower effect thresholds for these organism groups. For instance, the use of the ACR-based threshold for invertebrates (1/100 of the LC50 values; ACR is approximately a factor of 10 (17)) would underestimate the chronic risk by approximately 68 % compared to the field-based threshold (1/1,000 of the LC50 values).

### 1.5 Likelihood definition

We defined the likelihood for acute and chronic effects in field conditions based on the available literature on the ecological risk thresholds (Table S3). Observation of acute effects was likely at sites exceeding 1/10 of the LC50 values, because on average in 55 % of the cases, such concentrations led to adverse effects on organisms from insecticides and herbicides (Table S3; Overall chemical). Similarly, it was likely to observe chronic effects on invertebrates at sites that exceed 1/1,000 of the LC50 values, as 71 % of the cases reported shifts in invertebrate communities when exposed to pesticides (Table S3). We note that only pesticide-related threshold studies were available, and this limited availability should be considered when interpreting our results, which relate to organic chemicals in general. However, pesticides were the major contributors to the chemical risk in our study, and in the absence of other studies, we deem our analysis to be based on the best available knowledge.

### 1.6 Suitability of reported limits of quantification for chemical risk assessment

No risk is generally assumed from a compound that is reported below the limit of quantification. However, if the LOQ (and, when not available, the LOD) is greater than any of the two risk thresholds (ART or CRT) for any of the three organism groups, the real concentration might still exceed the respective risk threshold(s). Therefore, for each chemical, we calculated the frequency of sites with non-detects, where the LOQ values exceeded one of the risk thresholds. This procedure was not followed for Spain because the LOQ values for Spain were considered unreliable.

### 1.7 Influence of acute-risk chemicals (ARCs) on chemical risk

The chemical risk was calculated for groups of sites for each river basin at which a given number of ARCs were analyzed as:

$$CR_{r,j,b} = N_{r,j,b} / N_{total,r,b} \quad (3)$$

where  $N$  represents the number of sites for which one of the chemical concentrations exceeded the respective risk threshold  $j$  within a river basin  $b$ ,  $N_{total}$  represents the total number of sites

within that river basin, and  $r = 0$  to 36 and comprises all sites within a river basin with the respective number of analyzed ARCs. A value of  $r = 0$  represents sites where no ARCs were analyzed, while  $r = 36$  represents sites where all ARCs were analyzed. The risk threshold  $j$  is either the CRT or the ART. All basins that had less than three sites for each  $r$  group were excluded from this analysis.

The overall chemical risk in each ARC group  $r$  for each threshold  $j$  was subsequently calculated as the mean of all basins:

$$CR_{r,j} = \frac{1}{m} \sum_{i=1}^m CR_{r,j,i} \quad (4)$$

where  $i = 1, \dots, m$  indicates the number of river basins. For each  $r$  group, at least three basins were required for the calculation of the mean ( $CR_{r,j}$ ).

## 2. SI Discussion

**Influence of hydrophobic compounds on chemical risk:** Compounds with experimental or predicted effect concentrations that strongly exceeded the water solubility were omitted from the analysis (17, 13 and 15 compounds for fish, the invertebrate and algae, respectively, Table S1). Exceedance of the water solubility usually results in suspensions in the form of undissolved test material, which compromises the quantification of exposure concentrations (26). However, removal of these hydrophobic compounds from the dataset had only a negligible influence on the chemical risk, except for di-(2-ethylhexyl) phthalate (DEHP). This plasticizer is widely found at measurable concentrations in aquatic ecosystems because of its high production volume (included in more than 50 % of the European plasticizers; ref. 27). In addition, it has a high potential to persist in the environment and to bioaccumulate in biota (especially for invertebrates; ref. 28) due to its high lipophilicity. Large discrepancies are reported for the experimental and predicted lethal concentrations of DEHP, which will be discussed below.

Short-term experimental toxicity values for DEHP exceeded the water solubility of 3  $\mu\text{g/L}$  (at 20°C; ref. 28) by up to five-orders of magnitude for fish, and by up to three-orders of magnitude for the invertebrate and algae (e.g., ref. 29). In several studies, a clear dose-response relationship could not be established for DEHP, suggesting that the reported lethal effects were caused through physical mechanisms, such as coating on fish (26, 28). The unrealistically high effect concentrations reported are typically nominal instead of measured concentrations, which leads to an underestimation of DEHP toxicity (28). Given the high uncertainty associated with the experimental effect concentrations for DEHP, we suggest that the risk assessment should be based on QSAR predictions instead.

Using baseline toxicity based on the  $\log K_{ow}$  of DEHP (recommended value: 7.5; ref. 28), LC50 values resulted in 8.5  $\mu\text{g/L}$ , 2.2  $\mu\text{g/L}$  and 2.1  $\mu\text{g/L}$ , for fish, invertebrate and algae, respectively. Note that the quantitative structure-activity relationship (QSAR) models used for prediction are typically linear extrapolations, while it is argued that for hydrophobic compounds with a  $\log K_{ow} > 5.5$ , this relationship is parabolic (see ref. (26) and the references therein). Accounting for the deviation from linearity would increase the predicted LC50, and consequently reduce the chemical risk from DEHP. Hence, there is great uncertainty regarding the prediction of effect concentrations and the risk predictions derived from that.

By including the highly uncertain QSAR based LC50 for DEHP in our assessment, the acute and chronic chemical risk would increase by 6 % and 2 %, respectively, and render this compound responsible for the majority of exceedances (53 %) for the acute chemical risk. Thus, DEHP has the clear potential to increase the overall risk, although the quantification of risk with the current knowledge is highly uncertain. To avoid overestimation caused by highly uncertain predicted

values, we omitted DEHP from the main analysis, which is also in line with the above mentioned criteria for baseline toxicity predictions' domain ( $1 < \log K_{ow} < 6$ ). However, this does not rule out the potential of the DEHP or other hydrophobic compounds to cause ecological effects as a result of lethal or sublethal (e.g., endocrine disruption) effects (e.g., refs. 30, 31) .

### 3. SI Figures

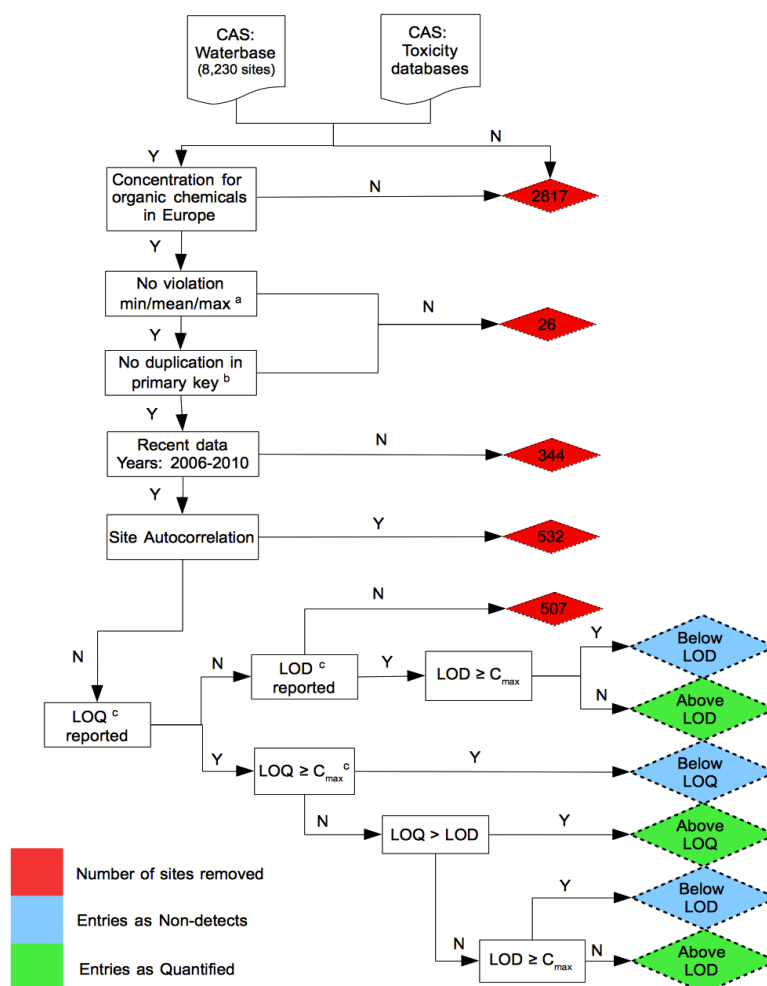

<sup>a</sup> The reported concentrations which had the following violations: (i) the mean is missing, (ii) the mean is negative which is not allowed or possible, (iii) the mean is zero which is not allowed or possible, (iv) the minimum is higher than the mean, (v) the mean is higher than the maximum and (vi) the minimum is higher than the maximum (2)

<sup>b</sup> Primary key is a field or combination of fields with values which have to be unique in the dataset.

<sup>c</sup> LOQ: limit of quantification, LOD: Limit of detection, C<sub>max</sub> maximum concentration analyzed

**Figure S1:** Flow chart visualising the quality control of the chemical dataset.



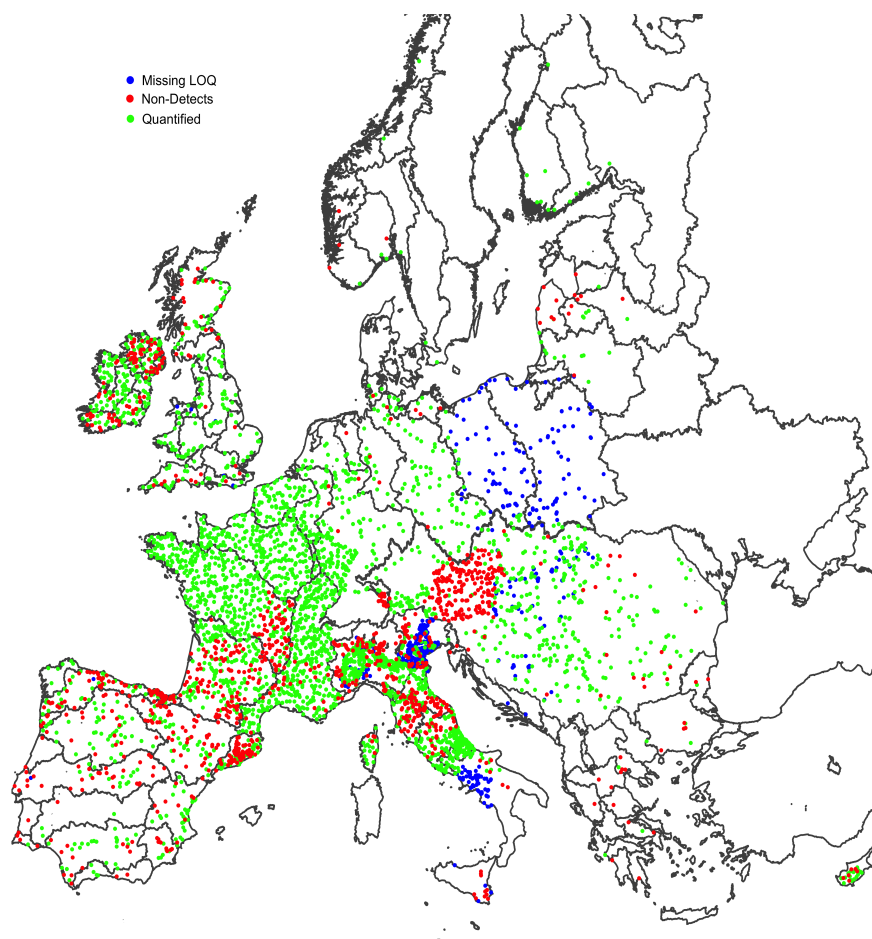

**Figure S2:** Overview of monitoring sites in Europe. Sites that have at least one chemical with a maximum concentration above the limit of quantification/limit of detection are classified as “quantified”(n = 2890). Sites with all measurements below the limit of quantification/limit of detection are classified as “non-detects” (n = 1114), and “missing LOQ” represents the sites which have no information on the limit of quantification/limit of detection (n = 506).

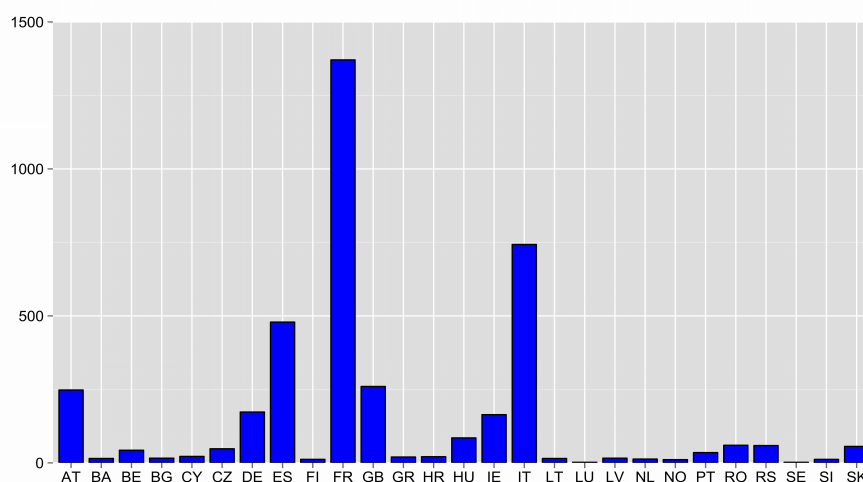

**Figure S3:** Number of sites monitored in each country during the 2006-2010 period. The codes correspond to AT: Austria, BA: Bosnia and Herzegovina, BE: Belgium, BG: Bulgaria, CY: Cyprus, CZ: Czech Republic, DE: Germany, ES: Spain, FI: Finland, FR: France, GB: Great Britain, GR: Greece, HR: Croatia, HU: Hungary, IE: Ireland, IT: Italy, LT: Lithuania, LU: Luxembourg, LV: Latvia, NL: Netherlands, NO: Norway, PT: Portugal, RO: Romania, RS: Serbia, SE: Sweden, SI: Slovenia, SK: Slovakia.

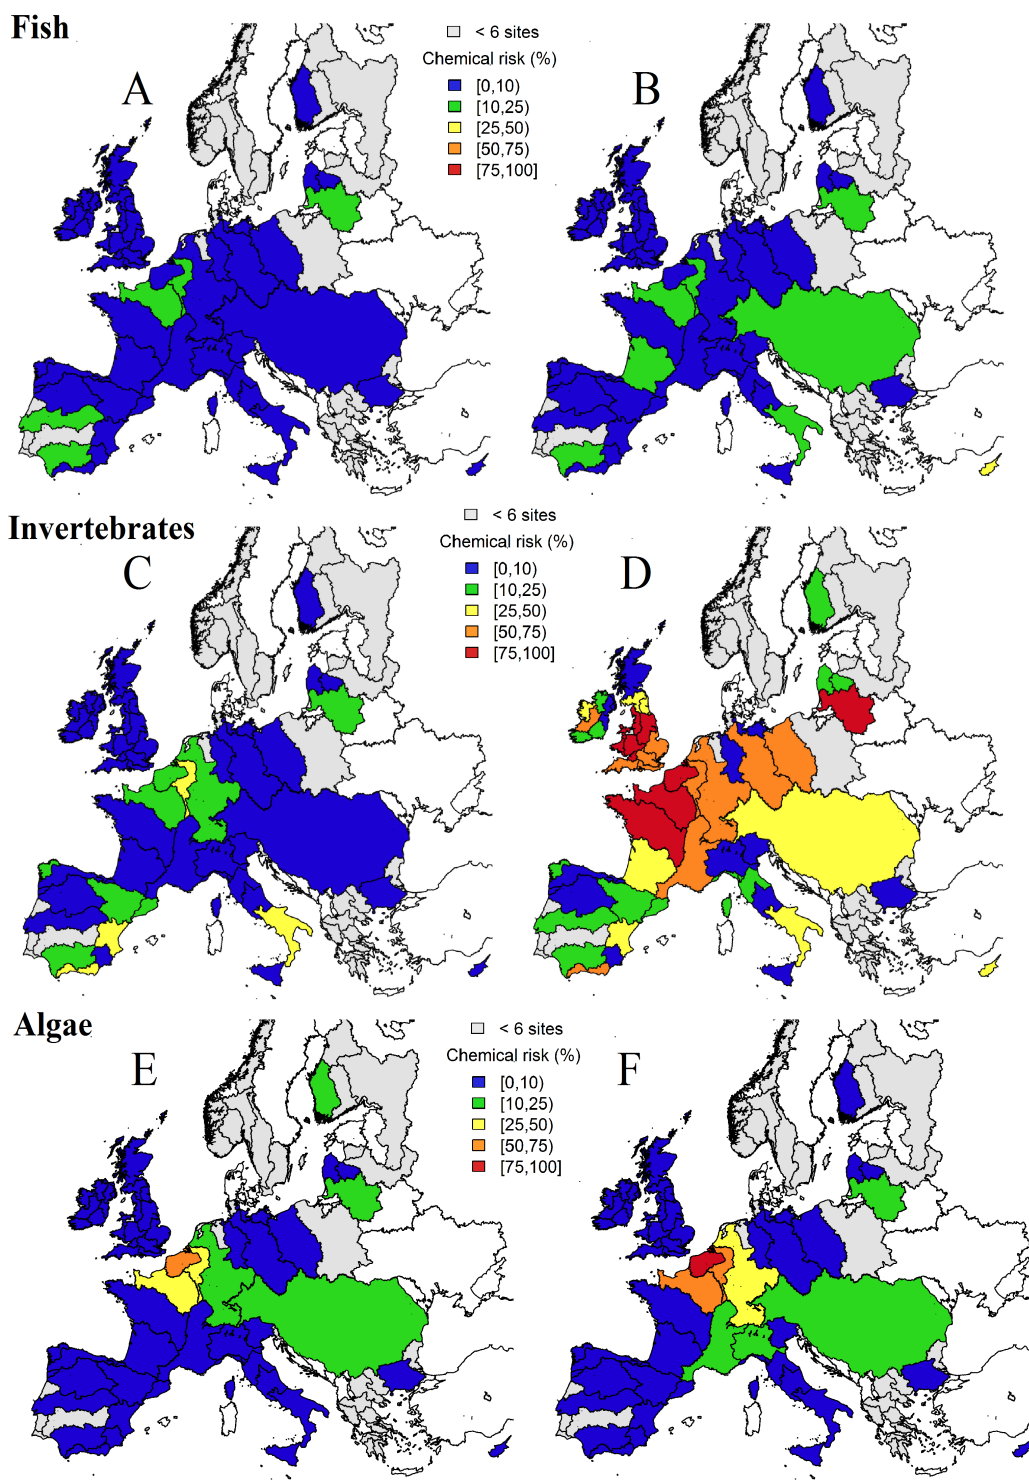

**Figure S4:** Chemical risk (by percentage range) in the European river basins separately for the three organism groups. The map displays the fraction of sites which exceeded the acute risk threshold (A, C, and E) and the chronic risk threshold (B, D and F) for fish (represented by *P. promelas*; A and B), invertebrates (represented by *D. magna*; C and D), and algae (represented by *P. subcapitata*; E and F). The colour range shows the level of chemical risk, from low chemical risk (blue) to high chemical risk (red). River basins with up to six sites are displayed in grey, whereas river basins without data are displayed in white. Direct comparisons between river systems is potentially biased by the ecotoxicologically relevant compounds analysed and the limit of quantification of the compounds.

#### 4. SI Tables

**Table S1:** Overview of chemicals analyzed and their toxicity. Information on the chemical group, the main applications, the octanol-water partitioning coefficient ( $K_{ow}$ ), the water solubility and the analytical methods are given for each chemical, identified by the Chemical Abstract Service (CAS) number. Information on the toxicity comprises the median lethal concentration (LC50) in  $\mu\text{g/L}$ , sources of the toxicity values and the type of data for each chemical and each organism group represented by the fish *P. promelas* (PP), the invertebrate *D. magna* (DM), and the algae *P. subcapitata* (PS).

| Chemical Group <sup>a</sup> | Main Application <sup>b</sup> | CAS    | Chemical Name             | $\log K_{ow}$ | Water Solubility [ $\mu\text{g/L}$ ] | LC50 [ $\mu\text{g/L}$ ] PP | Source PP | Type of data PP <sup>c</sup> | LC50 [ $\mu\text{g/L}$ ] DM | Source DM | Type of data DM <sup>c</sup> | LC50 [ $\mu\text{g/L}$ ] PS | Source PS | Type of data PS <sup>c</sup> | Analytical Methods <sup>d</sup> |
|-----------------------------|-------------------------------|--------|---------------------------|---------------|--------------------------------------|-----------------------------|-----------|------------------------------|-----------------------------|-----------|------------------------------|-----------------------------|-----------|------------------------------|---------------------------------|
| A                           | Ins                           | 50293  | 4,4'- DDT                 | 6.79          | 8.62                                 | 22.0                        | (32)      | E                            | 5.00                        | (14)      | E                            | -                           | -         | D                            | -                               |
| A                           | Ins                           | 53190  | 2,4'-DDD                  | 5.87          | 83.38                                | 463                         | (12)      | P/1                          | 9.10                        | (12)      | P/4                          | 145                         | (33)      | B                            | EN ISO 6468:1996                |
| A                           | Ins                           | 56382  | Parathion-ethyl           | 3.73          | 3669                                 | 1519                        | (32)      | E                            | 2.50                        | (14)      | E                            | 1436                        | (12)      | P/2                          | EN ISO 6468:1996                |
| A                           | Ins                           | 57125  | Cyanide                   | -0.69         | 352690000                            | 155                         | (32)      | E                            | 517                         | (32)      | E                            | -                           | -         | D                            | EN ISO 6468:1996                |
| A                           | Ins                           | 57749  | Chlordane                 | 6.26          | 33.14                                | 96.0                        | (32)      | E                            | 98.4                        | (32)      | E                            | -                           | -         | WS                           | -                               |
| A                           | Ins                           | 58899  | g-Hexachlorocyclohexane   | 4.26          | 3194                                 | 82.0                        | (32)      | E                            | 1600                        | (14)      | E                            | 3385                        | (33)      | B                            | -                               |
| A                           | Ins                           | 60515  | Dimethoate                | 0.72          | 7454800                              | 34548                       | (12)      | P/1                          | 2000                        | (14)      | E                            | 37000                       | (32)      | E                            | -                               |
| A                           | Ins                           | 60571  | Dieldrin                  | 5.45          | 120                                  | 24.0                        | (32)      | E                            | 250                         | (14)      | E                            | 39.0                        | (12)      | P/2                          | -                               |
| A                           | Ins                           | 62737  | Dichlorvos                | 0.60          | 10452000                             | 6230                        | (32)      | E                            | 0.19                        | (14)      | E                            | 737                         | (32)      | E                            | -                               |
| A                           | Ins                           | 72208  | Endrin                    | 5.45          | 120                                  | 1.00                        | (32)      | E                            | 117                         | (32)      | E                            | 39.0                        | (12)      | P/2                          | -                               |
| A                           | Ins                           | 72435  | Methoxychlor              | 5.67          | 264                                  | 24.0                        | (32)      | E                            | 50.0                        | (14)      | E                            | 1763                        | (12)      | P/1                          | EN ISO 6468:1996                |
| A                           | Ins                           | 72548  | 4,4'- DDD                 | 5.87          | 83.38                                | 375                         | (12)      | P/1                          | 9.00                        | (32)      | E                            | 614                         | (12)      | P/2                          | EN ISO 6468:1996                |
| A                           | Ins                           | 72559  | 4,4'- DDE                 | 6.00          | 72.31                                | 91.0                        | (12)      | P/1                          | 13.3                        | (12)      | P/4                          | 240                         | (12)      | P/1                          | EN ISO 6468:1996                |
| A                           | Ins                           | 76448  | Heptachlor                | 5.86          | 103                                  | 68.0                        | (32)      | E                            | 42.0                        | (14)      | E                            | 27.0                        | (14)      | E                            | -                               |
| A                           | Ins                           | 77474  | Hexachlorocyclopentadiene | 4.63          | 1241                                 | 74.0                        | (32)      | E                            | 46.0                        | (32)      | E                            | 190                         | (12)      | P/4                          | EN ISO 17993:2003/6468:1996     |
| A                           | Ins                           | 87865  | Pentachlorophenol         | 4.74          | 27202                                | 245                         | (12)      | P/4                          | 450                         | (14)      | E                            | 347                         | (32)      | E                            | -                               |
| A                           | Ins                           | 115297 | Endosulfan                | 3.50          | 75.69                                | 1.00                        | (32)      | E                            | 440                         | (14)      | E                            | 427.8                       | (32)      | E                            | -                               |
| A                           | Ins                           | 115322 | Dicofol                   | 5.81          | 9.28                                 | -                           | -         | WS                           | -                           | -         | WS                           | -                           | -         | WS                           | -                               |
| A                           | Ins                           | 121755 | Malathion                 | 2.29          | 6174200                              | 14100                       | (14)      | E                            | 0.70                        | (14)      | E                            | 13000                       | (14)      | E                            | EN ISO 6468:1996                |
| A                           | Ins                           | 122145 | Phenitrothion             | 3.30          | 38355                                | 4000                        | (14)      | E                            | 8.60                        | (14)      | E                            | 1300                        | (14)      | E                            | -                               |
| A                           | Ins                           | 143500 | Kepon                     | 4.91          | 4258                                 | 380                         | (32)      | E                            | 531                         | (32)      | E                            | 1539                        | (33)      | B                            | -                               |
| A                           | Ins                           | 297789 | Isobenzan                 | 4.51          | 84.38                                | -                           | -         | WS                           | 8.07                        | (12)      | P/4                          | -                           | -         | WS                           | EN ISO 10695:2000/6468:1996     |
| A                           | Ins                           | 298000 | Methyl parathion          | 2.75          | 36445                                | 7741                        | (14)      | E                            | 7.30                        | (14)      | E                            | 5400                        | (32)      | E                            | -                               |
| A                           | Ins                           | 309002 | Aldrin                    | 6.06          | 120                                  | 24.0                        | (32)      | E                            | 28.0                        | (14)      | E                            | 74.0                        | (12)      | P/3                          | -                               |
| A                           | Ins                           | 319846 | a-Hexachlorocyclohexane   | 4.26          | 3194                                 | 82.0                        | (12)      | P/4                          | 370                         | (14)      | E                            | 3385                        | (33)      | B                            | EN ISO 10695:2000               |
| A                           | Ins                           | 319857 | b-Hexachlorocyclohexane   | 4.26          | 3194                                 | 82.0                        | (12)      | P/4                          | 1084                        | (12)      | P/4                          | 3385                        | (33)      | B                            | -                               |
| A                           | Ins                           | 319868 | d-Hexachlorocyclohexane   | 4.26          | 3194                                 | 82.0                        | (12)      | P/4                          | 1084                        | (12)      | P/4                          | 3385                        | (33)      | B                            | -                               |
| A                           | Ins                           | 465736 | Isodrin                   | 6.06          | 120                                  | 167                         | (12)      | P/1                          | 69.3                        | (12)      | P/4                          | 74.0                        | (12)      | P/3                          | -                               |
| A                           | Ins                           | 470906 | Chlorfenvinfos            | 4.15          | 1549                                 | 360                         | (12)      | P/1                          | 0.25                        | (14)      | E                            | 5226                        | (33)      | B                            | EN ISO 6468:1996                |

| Chemical Group <sup>a</sup> | Main Application <sup>b</sup> | CAS       | Chemical Name                     | log K <sub>ow</sub> | Water Solubility [µg/L] | LC50 [µg/L] PP | Source PP | Type of data PP <sup>c</sup> | LC50 [µg/L] DM | Source DM | Type of data DM <sup>c</sup> | LC50 [µg/L] PS | Source PS | Type of data PS <sup>c</sup> | Analytical Methods <sup>d</sup> |
|-----------------------------|-------------------------------|-----------|-----------------------------------|---------------------|-------------------------|----------------|-----------|------------------------------|----------------|-----------|------------------------------|----------------|-----------|------------------------------|---------------------------------|
| A                           | Ins                           | 608731    | Hexachlorocyclohexane             | 4.26                | 3194                    | 125            | (32)      | E                            | 1084           | (12)      | P/4                          | 3385           | (33)      | B                            | -                               |
| A                           | Ins                           | 789026    | 2,4'-DDT                          | 6.79                | 8.62                    | 85.0           | (12)      | P/3                          | 5.07           | (12)      | P/4                          | -              | -         | D                            | -                               |
| A                           | Ins                           | 919868    | Demeton-S-Methyl                  | 1.01                | 4161300                 | 295850         | (12)      | P/1                          | 23.0           | (14)      | E                            | 1888914        | (33)      | B                            | EN ISO 6468:1996                |
| A                           | Ins                           | 959988    | Endosulfan I                      | 3.50                | 75.69                   | 1.00           | (32)      | E                            | 440            | (12)      | P/4                          | 43.0           | (12)      | P/2                          | -                               |
| A                           | Ins                           | 1024573   | Heptachloro Epoxide B             | 4.56                | 219                     | 471            | (12)      | P/1                          | 240            | (14)      | E                            | 40.0           | (12)      | P/3                          | -                               |
| A                           | Ins                           | 1113026   | Omethoate                         | -0.79               | 176770000               | -              | -         | D                            | 21.0           | (32)      | E                            | -              | -         | D                            | -                               |
| A                           | Ins                           | 1563662   | Carbofuran                        | 2.30                | 368070                  | 844            | (34)      | E                            | 9.40           | (14)      | E                            | 6500           | (14)      | E                            | -                               |
| A                           | Ins                           | 2310170   | Phosalone                         | 4.29                | 1048                    | 231            | (32)      | E                            | 0.74           | (35)      | E                            | 880            | (32)      | E                            | -                               |
| A                           | Ins                           | 2385855   | Mirex                             | 7.35                | 246                     | 2.16           | (12)      | P/1                          | 65.3           | (12)      | P/4                          | -              | -         | D                            | -                               |
| A                           | Ins                           | 2921882   | Chlorpyrifos                      | 5.11                | 266                     | 500            | (14)      | E                            | 0.10           | (14)      | E                            | 1586           | (12)      | P/3                          | -                               |
| A                           | Ins                           | 3424826   | 2,4'-DDE                          | 6.00                | 72.31                   | 91.8           | (12)      | P/1                          | 19.3           | (12)      | P/4                          | 487            | (12)      | P/1                          | -                               |
| A                           | Ins                           | 8001352   | Toxaphene                         | 6.79                | 10.37                   | 12.0           | (32)      | E                            | 14.1           | (35)      | E                            | -              | -         | WS                           | -                               |
| A                           | Ins                           | 10265926  | Methamidophos                     | -0.93               | 515720000               | 465820         | (12)      | P/1                          | 270            | (35)      | E                            | -              | -         | D                            | EN ISO 10301:1997               |
| A                           | Ins                           | 13071799  | Terbufos                          | 4.49                | 2098                    | 142            | (32)      | E                            | 0.31           | (35)      | E                            | 2111           | (33)      | B                            | -                               |
| A                           | Ins                           | 13356086  | Fenbutatin oxide                  | 13.63               | 0.00                    | -              | -         | WS                           | -              | -         | WS                           | -              | -         | WS                           | EN ISO 10301:1997               |
| A                           | Ins                           | 16752775  | Methomyl                          | 0.61                | 20149000                | 2110           | (34)      | E                            | 7.60           | (35)      | E                            | 60000          | (32)      | E                            | -                               |
| A                           | Ins                           | 17040196  | Demeton-S-methylsulfon            | -0.91               | 120920000               | 295850         | (12)      | P/1                          | 259            | (12)      | P/4                          | -              | -         | D                            | -                               |
| A                           | Ins                           | 18181709  | Iodofenphos                       | 5.39                | 63.43                   | 139            | (12)      | P/1                          | 1.60           | (35)      | E                            | -              | -         | WS                           | -                               |
| A                           | Ins                           | 23103982  | Pirimicarb                        | 1.40                | 1748900                 | 100000         | (14)      | E                            | 17.0           | (14)      | E                            | 140000         | (14)      | E                            | -                               |
| A                           | Ins                           | 39765805  | Trans-nonachlor                   | 6.44                | 9.54                    | 20.0           | (12)      | P/1                          | -              | -         | D                            | -              | -         | D                            | -                               |
| A                           | Ins                           | 52645531  | Permethrin                        | 7.43                | 1.57                    | 16.0           | (34)      | E                            | 0.60           | (35)      | E                            | -              | -         | D                            | EN ISO 17353:2005               |
| A                           | Ins                           | 112410238 | Tebufenozide                      | 4.62                | 679                     | 2116           | (12)      | P/1                          | 3800           | (35)      | E                            | 640            | (32)      | E                            | -                               |
| A                           | Ins                           | 120928098 | Fezaquin                          | 5.76                | 136                     | 179            | (12)      | P/1                          | 4.10           | (35)      | E                            | 208            | (35)      | E                            | -                               |
| A                           | Her                           | 75990     | Dalapon                           | 1.68                | 74590000                | 290000         | (32)      | E                            | 176220         | (12)      | B                            | 303432         | (33)      | B                            | -                               |
| A                           | Her                           | 88857     | Dinoseb                           | 3.67                | 19662                   | 700            | (34)      | E                            | 240            | (36)      | E                            | 20496          | (12)      | P/3                          | -                               |
| A                           | Her                           | 93721     | Fenoprop                          | 3.68                | 59374                   | 23000          | (14)      | E                            | 4379           | (12)      | B                            | 218197         | (12)      | P/3                          | -                               |
| A                           | Her                           | 93765     | 2,4,5-Trichlorophenoxyacetic Acid | 3.26                | 193480                  | 57711          | (12)      | P/3                          | 5000           | (14)      | E                            | 28042          | (12)      | P/3                          | -                               |
| A                           | Her                           | 94746     | MCPA                              | 2.52                | 836260                  | 134550         | (12)      | P/2                          | 190000         | (14)      | E                            | 15756          | (32)      | E                            | -                               |
| A                           | Her                           | 94757     | 2,4-D                             | 2.62                | 495230                  | 63400          | (35)      | E                            | 148281         | (36)      | E                            | 30624          | (32)      | E                            | -                               |
| A                           | Her                           | 94815     | MCPB                              | 3.50                | 117730                  | 12500          | (32)      | E                            | 55000          | (14)      | E                            | 41000          | (14)      | E                            | EN ISO 6468:1996                |
| A                           | Her                           | 94826     | 2,4'-DB                           | 3.60                | 127100                  | 18000          | (14)      | E                            | 25000          | (14)      | E                            | 33636          | (12)      | P/3                          | -                               |
| A                           | Her                           | 120365    | Dichlorprop                       | 3.03                | 690320                  | 71895          | (12)      | P/3                          | 100000         | (35)      | E                            | 194000         | (32)      | E                            | -                               |
| A                           | Her                           | 122349    | Simazine                          | 2.40                | 34471                   | 34921          | (12)      | P/1                          | 94000          | (14)      | E                            | 275            | (14)      | E                            | -                               |
| A                           | Her                           | 139402    | Propazine                         | 3.24                | 6371                    | 5017           | (12)      | P/1                          | 11000          | (14)      | E                            | 29.0           | (14)      | E                            | -                               |
| A                           | Her                           | 314409    | Bromacil                          | 1.68                | 680850                  | 186000         | (14)      | E                            | 121000         | (32)      | E                            | 7.00           | (14)      | E                            | -                               |
| A                           | Her                           | 330541    | Diuron                            | 2.67                | 63509                   | 14200          | (14)      | E                            | 5700           | (14)      | E                            | 2.00           | (14)      | E                            | -                               |
| A                           | Her                           | 330552    | Linuron                           | 2.91                | 117270                  | 9481           | (12)      | P/1                          | 477            | (14)      | E                            | 16.0           | (14)      | E                            | -                               |
| A                           | Her                           | 534521    | Dinitro-o-Cresol                  | 2.27                | 515150                  | 1745           | (34)      | E                            | 3200           | (36)      | E                            | 50000          | (12)      | P/4                          | -                               |
| A                           | Her                           | 834128    | Ametryne                          | 3.32                | 183640                  | 10850          | (32)      | E                            | 28000          | (14)      | E                            | 4.00           | (14)      | E                            | EN ISO 6468:1996                |
| A                           | Her                           | 886500    | Terbutryn                         | 3.77                | 15673                   | 3441           | (12)      | P/1                          | 7100           | (32)      | E                            | 3.00           | (32)      | E                            | -                               |

| Chemical Group <sup>a</sup> | Main Application <sup>b</sup> | CAS      | Chemical Name                | log K <sub>ow</sub> | Water Solubility [µg/L] | LC50 [µg/L] PP | Source PP | Type of data PP <sup>c</sup> | LC50 [µg/L] DM | Source DM | Type of data DM <sup>c</sup> | LC50 [µg/L] PS | Source PS | Type of data PS <sup>c</sup> | Analytical Methods <sup>d</sup> |
|-----------------------------|-------------------------------|----------|------------------------------|---------------------|-------------------------|----------------|-----------|------------------------------|----------------|-----------|------------------------------|----------------|-----------|------------------------------|---------------------------------|
| A                           | Her                           | 1007289  | Desisopropylatrazine         | 1.36                | 1213500                 | 89255          | (12)      | P/1                          | 132340         | (12)      | P/3                          | 77.0           | (12)      | P/3                          | EN ISO 6468:1996                |
| A                           | Her                           | 1014693  | Desmetryn                    | 2.82                | 114350                  | 2859           | (12)      | P/1                          | 26000          | (32)      | E                            | 25.0           | (35)      | E                            | EN ISO 6468:1996                |
| A                           | Her                           | 1066519  | Aminomethylphosphonic Acid   | -2.47               | 141410000000            | -              | -         | D                            | -              | -         | D                            | -              | -         | D                            | -                               |
| A                           | Her                           | 1071836  | Glyphosate                   | -4.77               | 6263500000              | 29867          | (32)      | E                            | 40000          | (35)      | E                            | 38964          | (32)      | E                            | EN ISO 6468:1996                |
| A                           | Her                           | 1194656  | Dichlobenil                  | 2.83                | 62544                   | 6532           | (14)      | E                            | 6200           | (14)      | E                            | 11024          | (12)      | P/3                          | EN ISO 6468:1996                |
| A                           | Her                           | 1582098  | Trifluralin                  | 5.31                | 284                     | 119            | (14)      | E                            | 245            | (14)      | E                            | 12.2           | (14)      | E                            | -                               |
| A                           | Her                           | 1610180  | Prometon                     | 3.57                | 119970                  | 6611           | (12)      | P/1                          | 41167          | (32)      | E                            | 98.0           | (32)      | E                            | -                               |
| A                           | Her                           | 1689834  | Ioxynil                      | 3.94                | 128340                  | 6800           | (34)      | E                            | 3900           | (35)      | E                            | 7276           | (12)      | P/1                          | -                               |
| A                           | Her                           | 1689845  | Bromoxynil                   | 3.39                | 43879                   | 12500          | (14)      | E                            | 12500          | (14)      | E                            | 4229           | (32)      | E                            | EN ISO 17993:2003               |
| A                           | Her                           | 1689992  | Bromoxynil Octanoate         | 5.86                | 15.75                   | -              | -         | WS                           | 46.0           | (35)      | E                            | -              | -         | WS                           | -                               |
| A                           | Her                           | 1698608  | Chloridazon                  | 0.76                | 370690                  | 545230         | (12)      | P/1                          | 132000         | (14)      | E                            | 3000           | (14)      | E                            | EN ISO 17993:2003               |
| A                           | Her                           | 1702176  | Clopyralid                   | 1.63                | 391450                  | 63700          | (12)      | P/1                          | 225000         | (37)      | E                            | 30500          | (35)      | E                            | -                               |
| A                           | Her                           | 1836755  | Nitrofen                     | 4.32                | 144                     | 666            | (12)      | P/3                          | 217            | (14)      | E                            | 123            | (12)      | P/3                          | -                               |
| A                           | Her                           | 1861401  | Benfluralin                  | 5.31                | 215                     | 100.0          | (32)      | E                            | 1143           | (32)      | E                            | -              | -         | WS                           | EN ISO 17993:2003               |
| A                           | Her                           | 1912249  | Atrazine                     | 2.82                | 14850                   | 13525          | (32)      | E                            | 54000          | (14)      | E                            | 143            | (14)      | E                            | EN ISO 17993:2003               |
| A                           | Her                           | 1918009  | Dicamba                      | 2.14                | 497360                  | 45796          | (12)      | P/1                          | 110300         | (12)      | P/4                          | 3700           | (32)      | E                            | -                               |
| A                           | Her                           | 1918134  | Chlorthiamid                 | 2.96                | 8414                    | 6444           | (12)      | P/1                          | 6343           | (12)      | P/3                          | 6538           | (12)      | P/1                          | -                               |
| A                           | Her                           | 2008584  | 2,6-dichlorobenzamide        | 0.90                | 73738                   | 469000         | (14)      | E                            | 180000         | (14)      | E                            | 5222           | (12)      | P/2                          | -                               |
| A                           | Her                           | 2164081  | Lenacil                      | 3.09                | 158330                  | 19357          | (12)      | P/1                          | 8400           | (14)      | E                            | 7.70           | (14)      | E                            | -                               |
| A                           | Her                           | 3397624  | Deisopropyldeethylatrazine   | 0.32                | 42275000                | 498310         | (12)      | P/1                          | -              | -         | D                            | 115            | (12)      | P/2                          | EN ISO 6468:1996                |
| A                           | Her                           | 5915413  | Terbutylazine                | 3.27                | 924                     | 8782           | (12)      | P/1                          | 13100          | (32)      | E                            | 12.0           | (14)      | E                            | EN ISO 10301:1997               |
| A                           | Her                           | 6190654  | Desethylatrazine             | 1.78                | 31628                   | 86693          | (12)      | P/1                          | 76529          | (12)      | P/4                          | 2000           | (32)      | E                            | -                               |
| A                           | Her                           | 7085190  | Mecoprop                     | 2.94                | 281400                  | 35134          | (12)      | P/2                          | 200000         | (35)      | E                            | 10000          | (32)      | E                            | -                               |
| A                           | Her                           | 7287196  | Prometryn                    | 3.73                | 23565                   | 2513           | (12)      | P/1                          | 12660          | (14)      | E                            | 16.0           | (14)      | E                            | EN ISO 10301:1997               |
| A                           | Her                           | 13684565 | Desmedipham                  | 3.22                | 12861                   | 9041           | (35)      | E                            | 450            | (35)      | E                            | 10             | (35)      | E                            | EN ISO 6468:1996                |
| A                           | Her                           | 15972608 | Alachlor                     | 3.37                | 170160                  | 5000           | (14)      | E                            | 10000          | (14)      | E                            | 5.00           | (14)      | E                            | -                               |
| A                           | Her                           | 16672870 | 2-Chloroethylphosphonic Acid | -0.25               | 131050000               | 130000         | (32)      | E                            | 31700          | (35)      | E                            | 1400           | (32)      | E                            | -                               |
| A                           | Her                           | 21087649 | Metribuzin                   | 1.49                | 1970200                 | 247100         | (12)      | P/1                          | 49000          | (14)      | E                            | 48.0           | (14)      | E                            | -                               |
| A                           | Her                           | 21725462 | Cyanazine                    | 2.51                | 6754                    | 18625          | (32)      | E                            | 49000          | (14)      | E                            | 22.0           | (14)      | E                            | -                               |
| A                           | Her                           | 23950585 | Propyzamide                  | 3.57                | 19546                   | 1658           | (12)      | P/1                          | 5600           | (32)      | E                            | 760            | (32)      | E                            | -                               |
| A                           | Her                           | 25057890 | Bentazone                    | 1.67                | 1003000                 | 185940         | (12)      | P/1                          | 125000         | (14)      | E                            | 4500           | (14)      | E                            | -                               |
| A                           | Her                           | 26225796 | Ethofumesate                 | 2.89                | 119440                  | 38663          | (12)      | P/1                          | 14000          | (14)      | E                            | 3900           | (14)      | E                            | -                               |
| A                           | Her                           | 26259450 | Secbumeton                   | 3.64                | 96381                   | 8527           | (12)      | P/1                          | 3992           | (12)      | B                            | 73.0           | (12)      | P/3                          | -                               |
| A                           | Her                           | 30125634 | Desethylterbutylazine        | 2.23                | 20915                   | 41547          | (12)      | P/1                          | 42000          | (14)      | E                            | 11.0           | (12)      | P/3                          | -                               |
| A                           | Her                           | 33693048 | Terbumeton                   | 3.60                | 83338                   | 51500          | (32)      | E                            | 40000          | (35)      | E                            | 42.5           | (32)      | E                            | -                               |
| A                           | Her                           | 34123596 | Isoproturon                  | 2.84                | 77471                   | 17586          | (12)      | P/1                          | 580            | (14)      | E                            | 13.6           | (32)      | E                            | -                               |
| A                           | Her                           | 34256821 | Acetochlor                   | 3.37                | 866070                  | 6105           | (12)      | P/3                          | 8600           | (35)      | E                            | 1430           | (32)      | E                            | EN ISO 18857-1:2006             |
| A                           | Her                           | 40487421 | Pendimethalin                | 4.82                | 1205                    | 164            | (12)      | P/1                          | 280            | (14)      | E                            | 6.00           | (14)      | E                            | -                               |
| A                           | Her                           | 41394052 | Metamitron                   | 1.44                | 2511300                 | 133740         | (12)      | P/1                          | 97000          | (32)      | E                            | 34909          | (12)      | P/2                          | -                               |
| A                           | Her                           | 51218452 | Metolachlor                  | 3.24                | 221820                  | 8200           | (32)      | E                            | 15595          | (14)      | E                            | 38.0           | (14)      | E                            | -                               |

| Chemical Group <sup>a</sup> | Main Application <sup>b</sup> | CAS       | Chemical Name           | log K <sub>ow</sub> | Water Solubility [µg/L] | LC50 [µg/L] PP | Source PP | Type of data PP <sup>c</sup> | LC50 [µg/L] DM | Source DM | Type of data DM <sup>c</sup> | LC50 [µg/L] PS | Source PS | Type of data PS <sup>c</sup> | Analytical Methods <sup>d</sup> |
|-----------------------------|-------------------------------|-----------|-------------------------|---------------------|-------------------------|----------------|-----------|------------------------------|----------------|-----------|------------------------------|----------------|-----------|------------------------------|---------------------------------|
| A                           | Her                           | 51235042  | Hexazinone              | 2.15                | 334940                  | 274000         | (32)      | E                            | 85000          | (14)      | E                            | 14.0           | (14)      | E                            | -                               |
| A                           | Her                           | 55512339  | Pyridate                | 5.73                | 52.80                   | 97.0           | (12)      | P/1                          | -              | -         | WS                           | 227            | (33)      | B                            | -                               |
| A                           | Her                           | 64902723  | Chlorsulfuron           | 2.26                | 3198                    | -              | -         | WS                           | -              | -         | WS                           | 68.0           | (35)      | E                            | -                               |
| A                           | Her                           | 67129082  | Metazachlor             | 2.38                | 153130                  | 81650          | (12)      | P/1                          | 33000          | (14)      | E                            | 16.0           | (14)      | E                            | EN ISO 18856:2005               |
| A                           | Her                           | 74223646  | Metsulfuronmethyl       | 2.00                | 3828                    | -              | -         | WS                           | -              | -         | WS                           | 395            | (32)      | E                            | -                               |
| A                           | Fun                           | 50000     | Formaldehyde            | 0.35                | 57018000                | 24100          | (32)      | E                            | 19200          | (32)      | E                            | 4249           | (32)      | E                            | -                               |
| A                           | Fun                           | 82688     | Pentachloronitrobenzene | 5.03                | 270                     | 55.0           | (12)      | P/1                          | 770            | (14)      | E                            | 493            | (12)      | P/2                          | -                               |
| A                           | Fun                           | 96457     | Ethylenthioiurea        | -0.49               | 3076200000              | 1957000        | (12)      | P/1                          | 21600          | (35)      | E                            | 93800          | (35)      | E                            | -                               |
| A                           | Fun                           | 118741    | Hexachlorobenzene       | 5.86                | 18.20                   | 56.9           | (12)      | P/2                          | 5.70           | (14)      | E                            | 30.0           | (32)      | E                            | -                               |
| A                           | Fun                           | 133062    | Captan                  | 2.74                | 55683                   | 120            | (32)      | E                            | 7100           | (35)      | E                            | 1180           | (35)      | E                            | -                               |
| A                           | Fun                           | 137268    | Thiram                  | 1.70                | 9613000                 | 24.0           | (32)      | E                            | 11.0           | (35)      | E                            | 65.0           | (35)      | E                            | -                               |
| A                           | Fun                           | 137304    | Ziram                   | 1.14                | 12291000                | 8.00           | (32)      | E                            | 48.0           | (35)      | E                            | 66.0           | (35)      | E                            | -                               |
| A                           | Fun                           | 57837191  | Metalaxyl               | 1.70                | 10208000                | 171160         | (12)      | P/1                          | 28000          | (14)      | E                            | 688            | (12)      | P/2                          | -                               |
| A                           | Fun                           | 60207901  | Propiconazole           | 4.13                | 2051                    | 3246           | (12)      | P/1                          | 10200          | (14)      | E                            | 5333           | (32)      | E                            | -                               |
| A                           | Fun                           | 67306030  | Fenpropimorph           | 5.50                | 2397                    | 530            | (12)      | P/1                          | 2240           | (35)      | E                            | 327            | (35)      | E                            | -                               |
| A                           | Fun                           | 136426545 | Fluquincozole           | 3.73                | 137                     | -              | -         | WS                           | -              | -         | WS                           | 46.0           | (35)      | E                            | -                               |
| B                           | Lub,Pla                       | 2051243   | PCB 209                 | 10.20               | 0.0014                  | -              | -         | WS                           | -              | -         | WS                           | -              | -         | WS                           | -                               |
| B                           | Lub,Pla                       | 7012375   | PCB 28                  | 5.69                | 241                     | 74.0           | (12)      | P/4                          | 160            | (14)      | E                            | 120            | (12)      | P/3                          | -                               |
| B                           | Lub,Pla                       | 31508006  | PCB 118                 | 6.98                | 9.38                    | 9.00           | (12)      | P/4                          | 10.1           | (12)      | P/4                          | -              | -         | D                            | -                               |
| B                           | Lub,Pla                       | 32598133  | PCB 77                  | 6.34                | 1.14                    | 2.00           | (32)      | E                            | 2.00           | (36)      | E                            | -              | -         | D                            | -                               |
| B                           | Lub,Pla                       | 32598144  | PCB 105                 | 6.98                | 9.38                    | 8.94           | (12)      | P/4                          | 10.1           | (12)      | P/4                          | -              | -         | D                            | EN ISO 18857-1:2006             |
| B                           | Lub,Pla                       | 32774166  | PCB 169                 | 7.62                | 1.80                    | 0.60           | (12)      | P/4                          | 5.06           | (12)      | P/4                          | -              | -         | D                            | -                               |
| B                           | Lub,Pla                       | 35065271  | PCB 153                 | 7.62                | 3.07                    | 1.00           | (32)      | E                            | 1.30           | (14)      | E                            | -              | -         | D                            | -                               |
| B                           | Lub,Pla                       | 35065282  | PCB 138                 | 7.62                | 3.07                    | 0.60           | (12)      | P/4                          | 6.08           | (12)      | P/4                          | -              | -         | D                            | -                               |
| B                           | Lub,Pla                       | 35065293  | PCB 180                 | 8.27                | 0.46                    | 0.53           | (12)      | P/3                          | 2.10           | (12)      | P/4                          | -              | -         | D                            | -                               |
| B                           | Lub,Pla                       | 35693993  | PCB 52                  | 6.34                | 19.66                   | 30.0           | (32)      | E                            | 30.0           | (32)      | E                            | -              | -         | D                            | -                               |
| B                           | Lub,Pla                       | 35694087  | PCB 194                 | 8.91                | 0.05                    | 0.20           | (32)      | E                            | 0.20           | (32)      | E                            | -              | -         | D                            | -                               |
| B                           | Lub,Pla                       | 37680732  | PCB 101                 | 6.98                | 9.38                    | 10.0           | (32)      | E                            | 10.00          | (32)      | E                            | -              | -         | D                            | -                               |
| B                           | Lub,Pla                       | 38380084  | PCB 156                 | 7.62                | 2.27                    | 0.60           | (12)      | P/4                          | 6.66           | (12)      | P/4                          | -              | -         | D                            | -                               |
| B                           | Lub,Pla                       | 57465288  | PCB 126                 | 6.98                | 9.38                    | 8.94           | (12)      | P/4                          | 10.1           | (12)      | P/4                          | -              | -         | D                            | -                               |
| B                           | Lub,Pla                       | 69782907  | PCB 157                 | 7.62                | 2.27                    | 0.60           | (12)      | P/4                          | 6.66           | (12)      | P/4                          | -              | -         | D                            | -                               |
| C                           | Byprod                        | 50328     | Benzo[a]pyrene          | 6.11                | 1.90                    | 6.00           | (38)      | E                            | 1.80           | (32)      | E                            | 15.0           | (14)      | E                            | EN ISO 6468:1996                |
| C                           | Byprod                        | 53703     | Dibenz[ah]anthracene    | 6.70                | 0.33                    | -              | -         | WS                           | -              | -         | WS                           | -              | -         | WS                           | EN ISO 6468:1996                |
| C                           | Byprod                        | 56553     | Benz[a]anthracene       | 5.52                | 7.56                    | -              | -         | WS                           | 71.6           | (32)      | E                            | -              | -         | WS                           | EN ISO 6468:1996                |
| C                           | Byprod                        | 83329     | Acenaphthene            | 4.15                | 5239                    | 1730           | (14)      | E                            | 2350           | (14)      | E                            | 520            | (14)      | E                            | -                               |
| C                           | Byprod                        | 85018     | Phenanthrene            | 4.35                | 665                     | 1016           | (12)      | P/3                          | 598            | (14)      | E                            | 411            | (14)      | E                            | -                               |
| C                           | Byprod                        | 86737     | Fluorene                | 4.02                | 4081                    | 2457           | (12)      | P/1                          | 430            | (14)      | E                            | 3400           | (32)      | E                            | -                               |
| C                           | Byprod                        | 90120     | 1-Methylnaphthalene     | 3.72                | 39933                   | 9000           | (32)      | E                            | 1422           | (32)      | E                            | 12000          | (32)      | E                            | -                               |
| C                           | Byprod                        | 91203     | Naphthalene             | 3.17                | 90836                   | 6140           | (14)      | E                            | 15000          | (14)      | E                            | 25000          | (14)      | E                            | -                               |
| C                           | Byprod                        | 91576     | 2-Methylnaphthalene     | 3.72                | 10479                   | 8993           | (12)      | P/4                          | 1670           | (32)      | E                            | 3281           | (12)      | P/2                          | -                               |

| Chemical Group <sup>a</sup> | Main Application <sup>b</sup> | CAS     | Chemical Name              | log K <sub>ow</sub> | Water Solubility [µg/L] | LC50 [µg/L] PP | Source PP | Type of data PP <sup>c</sup> | LC50 [µg/L] DM | Source DM | Type of data DM <sup>c</sup> | LC50 [µg/L] PS | Source PS | Type of data PS <sup>c</sup> | Analytical Methods <sup>d</sup> |
|-----------------------------|-------------------------------|---------|----------------------------|---------------------|-------------------------|----------------|-----------|------------------------------|----------------|-----------|------------------------------|----------------|-----------|------------------------------|---------------------------------|
| C                           | Byprod                        | 120127  | Anthracene                 | 4.35                | 665                     | 1015           | (12)      | P/3                          | 428            | (14)      | E                            | 225            | (12)      | P/3                          | -                               |
| C                           | Byprod                        | 129000  | Pyrene                     | 4.93                | 27.52                   | 200            | (32)      | E                            | 195            | (32)      | E                            | -              | -         | WS                           | -                               |
| C                           | Byprod                        | 135193  | 2-naphthalenol             | 2.69                | 204340                  | 3500           | (14)      | E                            | 3540           | (14)      | E                            | 18800          | (32)      | E                            | -                               |
| C                           | Byprod                        | 206440  | Fluoranthene               | 4.93                | 16.83                   | -              | -         | WS                           | 106            | (14)      | E                            | -              | -         | WS                           | -                               |
| C                           | Byprod                        | 208968  | Acephthylene               | 3.76                | 8394                    | 3659           | (12)      | P/1                          | 4204           | (12)      | P/3                          | 509            | (12)      | P/3                          | -                               |
| C                           | Byprod                        | 1634044 | MTBE                       | 1.43                | 59229000                | 672000         | (34)      | E                            | 136000         | (39)      | E                            | 73339          | (12)      | P/1                          | -                               |
| D                           | Sol                           | 87616   | 1,2,3-Trichlorobenzene     | 3.93                | 27463                   | 2987           | (12)      | P/4                          | 1850           | (14)      | E                            | 900            | (14)      | E                            | -                               |
| D                           | Sol                           | 95501   | 1,2-Dichlorobenzene        | 3.28                | 118710                  | 9470           | (14)      | E                            | 2300           | (14)      | E                            | 49800          | (32)      | E                            | -                               |
| D                           | Sol                           | 108703  | 1,3,5-Trichlorobenzene     | 3.93                | 15096                   | 2987           | (12)      | P/4                          | 7295           | (12)      | P/4                          | 1685           | (12)      | P/3                          | -                               |
| D                           | Sol                           | 108907  | Monochlorobenzene          | 2.64                | 199530                  | 25185          | (32)      | E                            | 19241          | (14)      | E                            | 12500          | (32)      | E                            | -                               |
| D                           | Sol                           | 120821  | 1,2,4-Trichlorobenzene     | 3.93                | 30356                   | 2990           | (14)      | E                            | 1700           | (32)      | E                            | 16867          | (32)      | E                            | -                               |
| D                           | Sol                           | 541731  | 1,3-Dichlorobenzene        | 3.28                | 118710                  | 8030           | (14)      | E                            | 9733           | (14)      | E                            | 4509           | (12)      | P/3                          | -                               |
| D                           | Sol                           | 608935  | Pentachlorobenzene         | 5.22                | 821                     | 306            | (14)      | E                            | 1327           | (32)      | E                            | 6600           | (14)      | E                            | -                               |
| E                           | Sol                           | 56235   | Carbon tetrachloride       | 2.44                | 388470                  | 43000          | (35)      | E                            | 29400          | (14)      | E                            | 70443          | (33)      | B                            | EN ISO 6468:1996                |
| E                           | Sol                           | 67663   | Trichloromethane           | 1.52                | 6622200                 | 70700          | (14)      | E                            | 228967         | (14)      | E                            | 349909         | (33)      | B                            | -                               |
| E                           | Sol                           | 71556   | 1,1,1-Trichloroethane      | 2.68                | 2276400                 | 52900          | (14)      | E                            | 11200          | (32)      | E                            | 37645          | (33)      | B                            | EN ISO 6468:1996                |
| E                           | Sol                           | 75092   | Dichloromethane            | 1.34                | 17630000                | 330000         | (34)      | E                            | 220000         | (14)      | E                            | 357960         | (33)      | B                            | -                               |
| E                           | Sol                           | 75274   | Bromodichloromethane       | 1.61                | 3215700                 | 220912         | (12)      | P/1                          | 234970         | (12)      | B                            | 400476         | (33)      | B                            | EN ISO 6468:1996                |
| E                           | Sol                           | 75343   | 1,1-Dichloroethane         | 1.76                | 6154500                 | 114673         | (12)      | P/1                          | 92185          | (12)      | P/4                          | 6460           | (12)      | P/1                          | EN ISO 6468:1996                |
| E                           | Sol                           | 75354   | 1,1-Dichloroethene         | 2.12                | 1846200                 | 135060         | (14)      | E                            | 51000          | (14)      | E                            | 23923          | (12)      | P/1                          | -                               |
| E                           | Sol                           | 75694   | Trichlorofluoromethane     | 2.13                | 1120600                 | 59442          | (12)      | P/1                          | 63928          | (12)      | B                            | 117591         | (33)      | B                            | EN ISO 6468:1996                |
| E                           | Sol                           | 75718   | Dichlorodifluoromethane    | 1.82                | 503450                  | 107990         | (12)      | P/1                          | 110070         | (12)      | B                            | 193462         | (33)      | B                            | -                               |
| E                           | Sol                           | 79005   | 1,1,2-Trichloroethane      | 2.01                | 4998600                 | 81600          | (14)      | E                            | 107333         | (14)      | E                            | 144600         | (14)      | E                            | -                               |
| E                           | Sol                           | 79016   | 1,1,2-Trichloroethene      | 2.47                | 696870                  | 44100          | (14)      | E                            | 59000          | (36)      | E                            | 56637          | (33)      | B                            | -                               |
| E                           | Sol                           | 87683   | Hexachlorobutadiene        | 4.72                | 1612                    | 90.0           | (34)      | E                            | 500            | (14)      | E                            | 143            | (12)      | P/2                          | -                               |
| E                           | Sol                           | 106934  | 1,2-Dibromoethane          | 2.01                | 3663400                 | 5074           | (12)      | P/1                          | 119000         | (14)      | E                            | 204878         | (33)      | B                            | -                               |
| E                           | Sol                           | 107062  | 1,2-Dichloroethane         | 1.83                | 9887600                 | 136000         | (14)      | E                            | 507000         | (14)      | E                            | 16254          | (12)      | P/1                          | -                               |
| E                           | Sol                           | 127184  | Tetrachloroethylene        | 2.97                | 187090                  | 13400          | (14)      | E                            | 14000          | (14)      | E                            | 5028           | (12)      | P/2                          | -                               |
| E                           | Sol                           | 156592  | Cis-1,2-Dichloroethylene   | 1.98                | 4980700                 | 30498          | (12)      | P/1                          | 62420          | (12)      | B                            | 112317         | (33)      | B                            | -                               |
| E                           | Sol                           | 156605  | Trans-1,2-Dichloroethylene | 1.98                | 4980700                 | 30498          | (12)      | P/1                          | 220000         | (14)      | E                            | 112317         | (33)      | B                            | -                               |
| E                           | Sol                           | 540590  | 1,2-Dichloroethene         | 1.98                | 4980700                 | 30498          | (12)      | P/1                          | 62420          | (12)      | B                            | 112317         | (33)      | B                            | -                               |
| E                           | Sol                           | 1070786 | 1,1,1,3-Tetrachloropropane | 3.42                | 398470                  | 6611           | (12)      | P/1                          | 11184          | (12)      | P/4                          | 11530          | (33)      | B                            | -                               |
| F                           | Sur                           | 58902   | 2,3,4,6-Tetrachlorophenol  | 4.09                | 125820                  | 1030           | (34)      | E                            | 175            | (14)      | E                            | 1300           | (14)      | E                            | EN ISO 10695:2000/6468:1996     |
| F                           | Sur                           | 59507   | 4-Chloro-3-Methylphenol    | 2.70                | 1055700                 | 7380           | (14)      | E                            | 2000           | (14)      | E                            | 25157          | (12)      | P/3                          | EN ISO 10695:2000/6468:1996     |
| F                           | Sur                           | 80057   | Bisphenol-a                | 3.64                | 367810                  | 4650           | (32)      | E                            | 10313          | (32)      | E                            | 2900           | (32)      | E                            | -                               |
| F                           | Sur                           | 87650   | 2,6-Dichlorophenol         | 2.80                | 8273000                 | 7748           | (12)      | P/4                          | 3400           | (14)      | E                            | 29000          | (14)      | E                            | -                               |
| F                           | Sur                           | 88062   | 2,4,6-Trichlorophenol      | 3.45                | 564320                  | 2285           | (12)      | P/4                          | 1710           | (14)      | E                            | 3500           | (14)      | E                            | -                               |
| F                           | Sur                           | 95487   | 2-Methylphenol             | 2.06                | 17303000                | 14000          | (14)      | E                            | 14689          | (14)      | E                            | 65000          | (14)      | E                            | EN 12918:1999/10695:2000        |
| F                           | Sur                           | 95874   | 2,5-Dimethylphenol         | 2.61                | 1749300                 | 18457          | (12)      | P/4                          | 6750           | (32)      | E                            | 7053           | (12)      | P/3                          | -                               |
| F                           | Sur                           | 95954   | 2,4,5-Trichlorophenol      | 3.45                | 550940                  | 902            | (14)      | E                            | 900            | (14)      | E                            | 1200           | (14)      | E                            | -                               |

| Chemical Group <sup>a</sup> | Main Application <sup>b</sup> | CAS       | Chemical Name               | log K <sub>ow</sub> | Water Solubility [µg/L] | LC50 [µg/L] PP | Source PP | Type of data PP <sup>c</sup> | LC50 [µg/L] DM | Source DM | Type of data DM <sup>c</sup> | LC50 [µg/L] PS | Source PS | Type of data PS <sup>c</sup> | Analytical Methods <sup>d</sup> |
|-----------------------------|-------------------------------|-----------|-----------------------------|---------------------|-------------------------|----------------|-----------|------------------------------|----------------|-----------|------------------------------|----------------|-----------|------------------------------|---------------------------------|
| F                           | Sur                           | 100027    | 4-Nitrophenol               | 1.91                | 7507500                 | 45633          | (32)      | E                            | 15200          | (36)      | E                            | 4540           | (32)      | E                            | -                               |
| F                           | Sur                           | 104405    | 4-Nonylphenol               | 5.99                | 215                     | 140            | (34)      | E                            | 135            | (32)      | E                            | 515            | (32)      | E                            | -                               |
| F                           | Sur                           | 106445    | 4-Methylphenol              | 2.06                | 15703000                | 16500          | (14)      | E                            | 4550           | (32)      | E                            | 10148          | (12)      | P/3                          | -                               |
| F                           | Sur                           | 120832    | 2,4-Dichlorophenol          | 2.80                | 3602500                 | 7750           | (14)      | E                            | 2600           | (14)      | E                            | 31520          | (14)      | E                            | -                               |
| F                           | Sur                           | 140669    | Para-tert-octylphenol       | 5.28                | 16110                   | 48.0           | (32)      | E                            | 90.0           | (36)      | E                            | 1900           | (12)      | P/4                          | -                               |
| F                           | Sur                           | 526750    | 2,3-Dimethylphenol          | 2.61                | 12016000                | 18457          | (12)      | P/4                          | 22500          | (32)      | E                            | 10215          | (12)      | P/3                          | -                               |
| F                           | Sur                           | 732263    | 2,4,6-tri-tert-Butylphenol  | 6.39                | 268                     | 61.0           | (32)      | E                            | 110            | (12)      | P/4                          | -              | -         | D                            | -                               |
| F                           | Sur                           | 1570645   | 4-Chloro-2-Methylphenol     | 2.70                | 1055700                 | 5471           | (12)      | P/4                          | 290            | (14)      | E                            | 29706          | (12)      | P/3                          | -                               |
| F                           | Sur                           | 1806264   | 4-Octylphenol               | 5.50                | 738                     | 287            | (12)      | P/3                          | 270            | (12)      | P/4                          | 189            | (12)      | P/3                          | EN ISO 17993:2003               |
| F                           | Sur                           | 4901513   | 2,3,4,5-Tetrachlorophenol   | 4.09                | 122490                  | 410            | (14)      | E                            | 1760           | (14)      | E                            | 877            | (12)      | P/3                          | EN ISO 10301:1997               |
| F                           | Sur                           | 84852153  | 4-Nonylphenol, branched     | 5.92                | 246                     | 138            | (32)      | E                            | 137            | (12)      | P/4                          | 410            | (32)      | E                            | -                               |
| G                           | AOxi                          | 71432     | Benzene                     | 1.99                | 1093300                 | 24600          | (14)      | E                            | 31277          | (12)      | E                            | 35000          | (14)      | E                            | -                               |
| G                           | AOxi                          | 95476     | o-Xylene                    | 3.09                | 189810                  | 16400          | (32)      | E                            | 17500          | (14)      | E                            | 4450           | (14)      | E                            | -                               |
| G                           | AOxi                          | 100414    | Ethylbenzene                | 3.03                | 166690                  | 12100          | (14)      | E                            | 18870          | (32)      | E                            | 5300           | (14)      | E                            | -                               |
| G                           | AOxi                          | 100425    | Styrene                     | 2.89                | 292600                  | 15928          | (14)      | E                            | 4721           | (12)      | E                            | 1218           | (14)      | E                            | -                               |
| G                           | AOxi                          | 106423    | p-Xylene                    | 3.09                | 189880                  | 8400           | (32)      | E                            | 32400          | (14)      | E                            | 3752           | (14)      | E                            | -                               |
| G                           | AOxi                          | 108383    | m-Xylene                    | 3.09                | 189790                  | 16000          | (32)      | E                            | 17584          | (32)      | E                            | 4368           | (14)      | E                            | -                               |
| G                           | AOxi                          | 1330207   | Xylene                      | 3.09                | 189790                  | 27710          | (32)      | E                            | 17500          | (14)      | E                            | 13099          | (33)      | B                            | EN ISO 6468:1996                |
| G                           | AOxi                          | 1825214   | Pentachloroanisole          | 5.30                | 139                     | 650            | (32)      | E                            | 27.0           | (36)      | E                            | 326            | (12)      | P/3                          | -                               |
| H                           | Sol                           | 106434    | 4-Chlorotoluene             | 3.18                | 60804                   | 3596           | (12)      | P/2                          | 3570           | (14)      | E                            | 7243           | (12)      | P/3                          | -                               |
| H                           | Sol                           | 108883    | Toluene                     | 2.54                | 461360                  | 36200          | (14)      | E                            | 6000           | (32)      | E                            | 10950          | (14)      | E                            | -                               |
| H                           | Sol                           | 118967    | 2,4,6-Trinitrotoluene       | 1.99                | 215060                  | 2190           | (14)      | E                            | 9250           | (14)      | E                            | 729            | (14)      | E                            | EN ISO 6468:1996                |
| H                           | Sol                           | 121142    | 2,4-Dinitrotoluol           | 2.18                | 301100                  | 24300          | (14)      | E                            | 35000          | (14)      | E                            | 807            | (32)      | E                            | -                               |
| I                           | AFun                          | 14488530  | Dibutyltin                  | 0.57                | 9566900                 | 1776100        | (12)      | P/1                          | 900            | (14)      | E                            | 6544           | (12)      | P/3                          | EN ISO 10301:1997               |
| I                           | AFun                          | 56573854  | Tributyltin                 | 7.35                | 7.41                    | 4.00           | (32)      | E                            | 4.30           | (14)      | E                            | 3.00           | (32)      | E                            | -                               |
| J                           | FIRet                         | 85223     | Pentabromoethylbenzene      | 7.48                | 0.29                    | -              | -         | WS                           | 2.18           | (12)      | P/4                          | -              | -         | WS                           | -                               |
| J                           | FIRet                         | 101553    | 4-Bromophenyl phenyl ether  | 4.94                | 2284                    | 575            | (32)      | E                            | 360            | (36)      | E                            | 2339           | (12)      | P/2                          | -                               |
| J                           | FIRet                         | 41318756  | PBDE 28                     | 5.88                | 38.91                   | 88.7           | (12)      | P/1                          | 248            | (12)      | P/4                          | 180            | (33)      | B                            | -                               |
| J                           | FIRet                         | 5436431   | PBDE 47                     | 6.77                | 0.31                    | -              | -         | WS                           | -              | -         | WS                           | -              | -         | D                            | -                               |
| J                           | FIRet                         | 60348609  | PBDE 99                     | 7.66                | 0.01                    | -              | -         | WS                           | -              | -         | WS                           | -              | -         | D                            | -                               |
| J                           | FIRet                         | 68631492  | PBDE 153                    | 8.55                | 3.07                    | -              | -         | WS                           | -              | -         | WS                           | -              | -         | D                            | -                               |
| J                           | FIRet                         | 182346210 | PBDE 85                     | 7.66                | 0.01                    | -              | -         | WS                           | -              | -         | WS                           | -              | -         | D                            | -                               |
| K                           | Pla                           | 84662     | Di-ethyl phthalate          | 2.65                | 531890                  | 21867          | (32)      | E                            | 54235          | (36)      | E                            | 48603          | (32)      | E                            | -                               |
| K                           | Pla                           | 84742     | Di-(n-butyl) phthalate      | 4.61                | 14851                   | 1610           | (32)      | E                            | 3700           | (36)      | E                            | 400            | (32)      | E                            | -                               |
| K                           | Pla                           | 85687     | Butyl benzyl phthalate      | 4.84                | 2272                    | 1533           | (32)      | E                            | 2000           | (36)      | E                            | 120            | (32)      | E                            | EN ISO 6468:1996                |
| K                           | Pla                           | 117817    | Di-(2-ethylhexyl) phthalate | 7.5                 | 3                       | -              | -         | WS                           | -              | -         | WS                           | -              | -         | WS                           | -                               |
| K                           | Pla                           | 131113    | Dimethyl phthalate          | 1.66                | 1790100                 | 121000         | (34)      | E                            | 33000          | (36)      | E                            | 70367          | (32)      | E                            | -                               |
| K                           | Pla                           | 131168    | Dipropyl phthalate          | 3.63                | 419510                  | 5523           | (12)      | P/3                          | 9274           | (12)      | P/4                          | 15200          | (12)      | P/3                          | -                               |
| K                           | Pla                           | 131180    | Dipentyl phthalate          | 5.59                | 1162                    | 153            | (12)      | P/3                          | 391            | (12)      | P/4                          | 5872           | (12)      | P/3                          | -                               |
| L                           | Mis                           | 60004     | EDTA                        | -3.86               | 4848600                 | 59800          | (32)      | E                            | -              | -         | D                            | 40842          | (12)      | P/1                          | -                               |



| Chemical Group <sup>a</sup> | Main Application <sup>b</sup> | CAS     | Chemical Name         | log K <sub>ow</sub> | Water Solubility [µg/L] | LC50 [µg/L] PP | Source PP | Type of data PP <sup>c</sup> | LC50 [µg/L] DM | Source DM | Type of data DM <sup>c</sup> | LC50 [µg/L] PS | Source PS | Type of data PS <sup>c</sup> | Analytical Methods <sup>d</sup> |
|-----------------------------|-------------------------------|---------|-----------------------|---------------------|-------------------------|----------------|-----------|------------------------------|----------------|-----------|------------------------------|----------------|-----------|------------------------------|---------------------------------|
| L                           | Mis                           | 75014   | Vinylchloride         | 1.62                | 4837500                 | 26624          | (12)      | P/1                          | 87715          | (12)      | B                            | 149716         | (33)      | B                            | -                               |
| L                           | Mis                           | 107131  | Acrylonitrile         | 0.21                | 69155000                | 16980          | (32)      | E                            | 8800           | (36)      | E                            | 2186680        | (33)      | B                            | -                               |
| L                           | Mis                           | 139139  | Nitrilotriacetic acid | -3.81               | 1839000000              | -              | -         | D                            | -              | -         | D                            | 30695          | (12)      | P/1                          | -                               |
| L                           | Mis                           | 2599113 | Hydroxysimazine       | 1.67                | 833040                  | 132410         | (12)      | P/1                          | 165760         | (12)      | P/3                          | 36.0           | (12)      | P/3                          | -                               |

<sup>a</sup> **A:** Pesticides and transformation products, **B:** Polychlorinated biphenyls, **C:** Polycyclic aromatic hydrocarbons and derivatives, **D:** Halogenated benzenes and nitrobenzenes, **E:** Halogenated alkanes, **F:** Phenols and chlorophenols, **G:** Anilines, anisoles and alkylated benzenes, **H:** Toluenes and halogenated derivatives, **I:** Organotin compounds, **J:** Brominated flame retardants, **K:** Phthalates, **L:** Miscellaneous.

<sup>b</sup> **Her:** Herbicides, **Fun:** Fungicides, **Ins:** Insecticides, **Lub,Pla:** Lubricants, plasticizers, **Byprod:** Byproducts of petroleum processing or combustion, **Sol:** Solvent, **Sur:** Surfactant, **AOxi:** Anti-oxidants, **AFun:** Anti-fungal, **FIRet:** Flame retardants, **Pla:** Plasticizer, **Mis:** Miscellaneous

<sup>c</sup> **E:** Experimental toxicity data from literature, **B:** Baseline toxicity data estimated from the octanol/water partitioning coefficient, **P:** Predicted toxicity data from read across together with the level of reliability (1: low ; 2: moderate ; 3: high and 4: very high). Toxicity values were removed when they lay outside of the model domain ( $1 < \log K_{ow} < 6$ ) for the baseline prediction (**D**), or when they exceed water solubility by a factor of 10 (**WS**).

<sup>d</sup> **DIN EN ISO 6468:1996** - Water quality. Determination of certain organochlorine insecticides, polychlorinated biphenyls and chlorobenzenes - Gas-chromatographic method after liquid-liquid extraction; **DIN EN ISO 17993:2003** - Water quality. Determination of 15 polycyclic aromatic hydrocarbons (PAH) in water by HPLC with fluorescence detection after liquid-liquid extraction; **DIN EN ISO 10301:1997** - Water quality. Determination of highly volatile halogenated hydrocarbons – Gas chromatographic methods; **EN ISO 10695:2000** - Water quality. Determination of selected organic nitrogen and phosphorus compounds -- Gas chromatographic methods; **EN ISO 18856:2005** - Water quality. Determination of selected phthalates using gas chromatography/mass spectrometry; **EN ISO 17353:2005** - Water quality. Determination of selected organotin compounds. Gas chromatographic method; **EN ISO 18857-1:2006** - Water quality. Determination of selected alkylphenols - Part 1: Method for non-filtered samples using liquid-liquid extraction and gas chromatography with mass selective detection; **DIN EN 12918:1999** - Water quality. Determination of parathion, parathion-methyl and some other organophosphorus compounds in water by dichloromethane extraction and gas chromatographic analysis

**Table S2:** Number of sites with quantified and non-detected concentrations for each chemical. The frequency of exceedance (%; in parentheses) and the number of sites are given for each chemical after comparing the limit of quantification (LOQ) for the non-detects with the chronic risk threshold (CRT) and the acute risk threshold (ART).

| Chemical Name           | No. Cases <sup>a</sup> |             |                      |                      |
|-------------------------|------------------------|-------------|----------------------|----------------------|
|                         | Quantified             | Non-Detects | LOQ>CRT <sup>b</sup> | LOQ>ART <sup>b</sup> |
| Fluoranthene            | 976                    | 67          | 67(100)              | 12(18)               |
| Benzo[a]pyrene          | 924                    | 967         | 838(87)              | 65(7)                |
| Diuron                  | 859                    | 1201        | 264(22)              | 32(3)                |
| Naphthalene             | 826                    | 919         | 17(2)                | 1(0)                 |
| Atrazine                | 820                    | 2016        | 23(1)                | 14(1)                |
| Isoproturon             | 727                    | 1233        | 19(2)                | 0(0)                 |
| Metolachlor             | 480                    | 736         | 23(3)                | 10(1)                |
| Tributyltin             | 479                    | 1005        | 581(58)              | 0(0)                 |
| Simazine                | 473                    | 2284        | 14(1)                | 4(0)                 |
| g-Hexachlorocyclohexane | 457                    | 1904        | 33(2)                | 14(1)                |
| MCPA                    | 432                    | 1024        | 0(0)                 | 0(0)                 |
| Mecoprop                | 407                    | 1082        | 0(0)                 | 0(0)                 |
| Glyphosate              | 397                    | 326         | 0(0)                 | 0(0)                 |
| Phenanthrene            | 391                    | 313         | 15(5)                | 0(0)                 |
| Pyrene                  | 361                    | 15          | 15(100)              | 0(0)                 |
| Alachlor                | 341                    | 2261        | 18(1)                | 18(1)                |
| Anthracene              | 327                    | 1585        | 70(4)                | 4(0)                 |
| Terbutylazine           | 316                    | 1008        | 12(1)                | 6(1)                 |
| Trichloromethane        | 299                    | 1700        | 16(1)                | 0(0)                 |
| Bentazone               | 295                    | 857         | 0(0)                 | 0(0)                 |
| Benz[a]anthracene       | 289                    | 7           | 7(100)               | 0(0)                 |
| Desethylatrazine        | 286                    | 772         | 0(0)                 | 0(0)                 |
| Metazachlor             | 285                    | 693         | 0(0)                 | 0(0)                 |
| Tetrachloroethylene     | 276                    | 1753        | 21(1)                | 17(1)                |
| 2,4-D                   | 265                    | 892         | 0(0)                 | 0(0)                 |
| Endrin                  | 257                    | 2158        | 436(20)              | 73(3)                |
| Dichloromethane         | 254                    | 1650        | 14(1)                | 0(0)                 |
| Linuron                 | 233                    | 1555        | 35(2)                | 0(0)                 |
| Pentachlorophenol       | 221                    | 1704        | 186(11)              | 4(0)                 |
| 4,4'- DDT               | 206                    | 1005        | 1005(100)            | 61(6)                |
| Carbofuran              | 204                    | 780         | 753(97)              | 0(0)                 |
| Isodrin                 | 201                    | 1984        | 80(4)                | 4(0)                 |
| Chlorpyrifos            | 191                    | 1935        | 1934(100)            | 1149(59)             |
| Hexachlorobenzene       | 188                    | 2139        | 1248(58)             | 81(4)                |
| a-Hexachlorocyclohexane | 183                    | 1156        | 10(1)                | 10(1)                |
| Toluene                 | 183                    | 1351        | 31(2)                | 17(1)                |
| Para-tert-octylphenol   | 180                    | 1066        | 370(35)              | 7(1)                 |
| 1,3,5-Trichlorobenzene  | 177                    | 874         | 0(0)                 | 0(0)                 |
| Benzene                 | 174                    | 1975        | 21(1)                | 0(0)                 |
| b-Hexachlorocyclohexane | 169                    | 1146        | 10(1)                | 10(1)                |
| Dieldrin                | 167                    | 2256        | 73(3)                | 6(0)                 |
| Aldrin                  | 164                    | 2250        | 162(7)               | 4(0)                 |
| Trifluralin             | 153                    | 2213        | 81(4)                | 12(1)                |
| 1,1,2-Trichloroethene   | 145                    | 1755        | 17(1)                | 0(0)                 |
| 1,2-Dichloroethane      | 142                    | 2101        | 17(1)                | 0(0)                 |
| 1,2,4-Trichlorobenzene  | 130                    | 1028        | 9(1)                 | 0(0)                 |
| 4,4'- DDD               | 129                    | 1441        | 911(63)              | 12(1)                |

| Chemical Name           | No. Cases <sup>a</sup> |             |                      |                      |
|-------------------------|------------------------|-------------|----------------------|----------------------|
|                         | Quantified             | Non-Detects | LOQ>CRT <sup>b</sup> | LOQ>ART <sup>b</sup> |
| Fluoranthene            | 976                    | 67          | 67(100)              | 12(18)               |
| Metalaxyl               | 127                    | 831         | 10(1)                | 0(0)                 |
| 2,4'-DDT                | 125                    | 863         | 863(100)             | 12(1)                |
| 1,2,3-Trichlorobenzene  | 116                    | 899         | 0(0)                 | 0(0)                 |
| Fluorene                | 110                    | 524         | 1(0)                 | 0(0)                 |
| Propyzamide             | 103                    | 849         | 0(0)                 | 0(0)                 |
| Pirimicarb              | 100                    | 527         | 388(74)              | 10(2)                |
| 4,4'- DDE               | 95                     | 1491        | 116(8)               | 4(0)                 |
| Heptachlor              | 94                     | 1075        | 49(5)                | 10(1)                |
| Chlorfenvinfos          | 90                     | 2049        | 2048(100)            | 588(29)              |
| 2-Methylnaphthalene     | 88                     | 180         | 0(0)                 | 0(0)                 |
| Endosulfan I            | 88                     | 1859        | 440(24)              | 58(3)                |
| Carbon tetrachloride    | 87                     | 1957        | 21(1)                | 0(0)                 |
| Prometryn               | 86                     | 770         | 0(0)                 | 0(0)                 |
| Dimethoate              | 85                     | 997         | 10(1)                | 0(0)                 |
| Acenaphthene            | 83                     | 349         | 15(4)                | 0(0)                 |
| 2,6-dichlorobenzamide   | 82                     | 490         | 0(0)                 | 0(0)                 |
| Hexachlorobutadiene     | 81                     | 2048        | 128(6)               | 78(4)                |
| Acetochlor              | 77                     | 295         | 0(0)                 | 0(0)                 |
| PCB 28                  | 75                     | 422         | 1(0)                 | 1(0)                 |
| Ethofumesate            | 74                     | 814         | 0(0)                 | 0(0)                 |
| o-Xylene                | 72                     | 151         | 0(0)                 | 0(0)                 |
| Pentachlorobenzene      | 72                     | 1719        | 4(0)                 | 4(0)                 |
| Cyanide                 | 71                     | 73          | 73(100)              | 0(0)                 |
| Ethylbenzene            | 70                     | 321         | 0(0)                 | 0(0)                 |
| Chloridazon             | 67                     | 466         | 0(0)                 | 0(0)                 |
| 1,1,1-Trichloroethane   | 63                     | 1068        | 0(0)                 | 0(0)                 |
| Parathion-ethyl         | 63                     | 864         | 782(91)              | 14(2)                |
| Pendimethalin           | 62                     | 1044        | 8(1)                 | 0(0)                 |
| Propazine               | 60                     | 629         | 14(2)                | 8(1)                 |
| Di-(n-butyl) phthalate  | 58                     | 48          | 20(42)               | 0(0)                 |
| Dibutyltin              | 58                     | 500         | 0(0)                 | 0(0)                 |
| Methoxychlor            | 58                     | 385         | 0(0)                 | 0(0)                 |
| Propiconazole           | 58                     | 398         | 10(3)                | 0(0)                 |
| Dichlorvos              | 56                     | 1020        | 1019(100)            | 560(55)              |
| d-Hexachlorocyclohexane | 54                     | 641         | 0(0)                 | 0(0)                 |
| Heptachloro Epoxide B   | 53                     | 262         | 0(0)                 | 0(0)                 |
| Desisopropylatrazine    | 51                     | 902         | 0(0)                 | 0(0)                 |
| PCB 118                 | 49                     | 8           | 8(100)               | 5(62)                |
| 2-naphthalenol          | 42                     | 95          | 0(0)                 | 0(0)                 |
| Terbutryn               | 42                     | 160         | 23(14)               | 6(4)                 |
| 1,1-Dichloroethene      | 38                     | 561         | 0(0)                 | 0(0)                 |
| Dicamba                 | 37                     | 707         | 0(0)                 | 0(0)                 |
| Dichlorprop             | 37                     | 414         | 0(0)                 | 0(0)                 |
| 4-Octylphenol           | 36                     | 462         | 0(0)                 | 0(0)                 |
| Bromodichloromethane    | 36                     | 99          | 0(0)                 | 0(0)                 |
| Ziram                   | 36                     | 46          | 46(100)              | 0(0)                 |
| 1,2-Dichlorobenzene     | 35                     | 674         | 1(0)                 | 0(0)                 |
| Acephthylene            | 32                     | 594         | 9(2)                 | 0(0)                 |
| Dichlobenil             | 32                     | 720         | 0(0)                 | 0(0)                 |
| 4-Nonylphenol           | 31                     | 1065        | 143(13)              | 0(0)                 |
| Endosulfan              | 31                     | 168         | 49(29)               | 0(0)                 |
| Pentabromoethylbenzene  | 31                     | 18          | 18(100)              | 0(0)                 |

| Chemical Name                     | No. Cases <sup>a</sup> |             |                      |                      |
|-----------------------------------|------------------------|-------------|----------------------|----------------------|
|                                   | Quantified             | Non-Detects | LOQ>CRT <sup>b</sup> | LOQ>ART <sup>b</sup> |
| Fluoranthene                      | 976                    | 67          | 67(100)              | 12(18)               |
| Styrene                           | 31                     | 188         | 0(0)                 | 0(0)                 |
| 1,1-Dichloroethane                | 30                     | 595         | 0(0)                 | 0(0)                 |
| Malathion                         | 30                     | 1246        | 1225(98)             | 168(13)              |
| Trichlorofluoromethane            | 30                     | 51          | 0(0)                 | 0(0)                 |
| 1,1,2-Trichloroethane             | 29                     | 241         | 0(0)                 | 0(0)                 |
| 1,3-Dichlorobenzene               | 29                     | 240         | 6(2)                 | 0(0)                 |
| Lenacil                           | 29                     | 597         | 0(0)                 | 0(0)                 |
| 4-Chlorotoluene                   | 28                     | 751         | 14(2)                | 0(0)                 |
| Bromacil                          | 27                     | 976         | 0(0)                 | 0(0)                 |
| Metribuzin                        | 27                     | 812         | 0(0)                 | 0(0)                 |
| Permethrin                        | 27                     | 600         | 600(100)             | 41(7)                |
| Hexazinone                        | 26                     | 530         | 0(0)                 | 0(0)                 |
| Monochlorobenzene                 | 26                     | 234         | 0(0)                 | 0(0)                 |
| PCB 153                           | 26                     | 30          | 30(100)              | 1(3)                 |
| PCB 126                           | 25                     | 0           | 0(0)                 | 0(0)                 |
| PCB 138                           | 25                     | 12          | 12(100)              | 1(8)                 |
| 1,2-Dibromoethane                 | 24                     | 691         | 0(0)                 | 0(0)                 |
| Methyl parathion                  | 24                     | 1014        | 869(86)              | 16(2)                |
| Bisphenol-a                       | 23                     | 10          | 0(0)                 | 0(0)                 |
| Desmedipham                       | 23                     | 24          | 1(4)                 | 0(0)                 |
| Trans-1,2-Dichloroethylene        | 23                     | 444         | 0(0)                 | 0(0)                 |
| 2-Chloroethylphosphonic Acid      | 21                     | 82          | 0(0)                 | 0(0)                 |
| 2,3,4,5-Tetrachlorophenol         | 20                     | 209         | 0(0)                 | 0(0)                 |
| 2,4,6-tri-tert-Butylphenol        | 20                     | 5           | 5(100)               | 0(0)                 |
| Clopyralid                        | 20                     | 677         | 0(0)                 | 0(0)                 |
| Dicofol                           | 20                     | 0           | 0(0)                 | 0(0)                 |
| Phenitrothion                     | 20                     | 1239        | 1141(92)             | 10(1)                |
| 1,2-Dichloroethene                | 19                     | 78          | 0(0)                 | 0(0)                 |
| Dichlorodifluoromethane           | 18                     | 36          | 0(0)                 | 0(0)                 |
| 2,4,5-Trichlorophenoxyacetic acid | 17                     | 769         | 0(0)                 | 0(0)                 |
| Fenpropimorph                     | 17                     | 545         | 0(0)                 | 0(0)                 |
| Methamidophos                     | 17                     | 0           | 0(0)                 | 0(0)                 |
| PCB 101                           | 17                     | 3           | 3(100)               | 1(33)                |
| Chlordane                         | 16                     | 0           | 0(0)                 | 0(0)                 |
| Metamitron                        | 16                     | 691         | 0(0)                 | 0(0)                 |
| PCB 52                            | 16                     | 1           | 1(100)               | 1(100)               |
| Xylene                            | 16                     | 145         | 0(0)                 | 0(0)                 |
| PCB 180                           | 15                     | 2           | 2(100)               | 1(50)                |
| 2,4-Dichlorophenol                | 14                     | 49          | 17(35)               | 17(35)               |
| Cis-1,2-Dichloroethylene          | 13                     | 18          | 0(0)                 | 0(0)                 |
| Terbumeton                        | 13                     | 618         | 0(0)                 | 0(0)                 |
| Vinylchloride                     | 13                     | 60          | 7(12)                | 0(0)                 |
| Ametryne                          | 12                     | 406         | 12(3)                | 0(0)                 |
| 1-Methylnaphthalene               | 11                     | 93          | 0(0)                 | 0(0)                 |
| 2,4,6-Trichlorophenol             | 11                     | 23          | 0(0)                 | 0(0)                 |
| 2,4'-DB                           | 11                     | 124         | 0(0)                 | 0(0)                 |
| Desmetryn                         | 11                     | 485         | 0(0)                 | 0(0)                 |
| 4-Nonylphenol, branched           | 10                     | 38          | 18(47)               | 11(29)               |
| Benfluralin                       | 10                     | 0           | 0(0)                 | 0(0)                 |
| Hexachlorocyclohexane             | 10                     | 201         | 0(0)                 | 0(0)                 |
| PCB 77                            | 10                     | 130         | 130(100)             | 0(0)                 |
| 2,4'-DDD                          | 9                      | 85          | 54(64)               | 0(0)                 |

| Chemical Name              | No. Cases <sup>a</sup> |             |                      |                      |
|----------------------------|------------------------|-------------|----------------------|----------------------|
|                            | Quantified             | Non-Detects | LOQ>CRT <sup>b</sup> | LOQ>ART <sup>b</sup> |
| Fluoranthene               | 976                    | 67          | 67(100)              | 12(18)               |
| Butyl benzyl phthalate     | 9                      | 20          | 20(100)              | 20(100)              |
| Demeton-S-Methyl           | 9                      | 611         | 501(82)              | 0(0)                 |
| Fluquincozole              | 9                      | 0           | 0(0)                 | 0(0)                 |
| MCPB                       | 9                      | 38          | 0(0)                 | 0(0)                 |
| Methomyl                   | 9                      | 448         | 383(85)              | 0(0)                 |
| MTBE                       | 9                      | 25          | 0(0)                 | 0(0)                 |
| Prometon                   | 9                      | 398         | 0(0)                 | 0(0)                 |
| 2,4'-DDE                   | 8                      | 89          | 22(25)               | 0(0)                 |
| Bromoxynil                 | 8                      | 308         | 0(0)                 | 0(0)                 |
| Demeton-S-methylsulfon     | 8                      | 0           | 0(0)                 | 0(0)                 |
| PCB 169                    | 8                      | 82          | 82(100)              | 0(0)                 |
| Phosalone                  | 8                      | 312         | 312(100)             | 19(6)                |
| Chlorsulfuron              | 7                      | 0           | 0(0)                 | 0(0)                 |
| Formaldehyde               | 7                      | 53          | 29(55)               | 0(0)                 |
| Ioxynil                    | 7                      | 254         | 0(0)                 | 0(0)                 |
| Pentachloronitrobenzene    | 7                      | 392         | 0(0)                 | 0(0)                 |
| Cyanazine                  | 6                      | 460         | 0(0)                 | 0(0)                 |
| Dipropyl phthalate         | 6                      | 62          | 0(0)                 | 0(0)                 |
| Fenoprop                   | 6                      | 8           | 0(0)                 | 0(0)                 |
| Deisopropyldeethylatrazine | 5                      | 0           | 0(0)                 | 0(0)                 |
| EDTA                       | 5                      | 0           | 0(0)                 | 0(0)                 |
| 2,4-Dinitrotoluol          | 4                      | 110         | 19(17)               | 0(0)                 |
| 4-Bromophenyl phenyl ether | 4                      | 40          | 19(48)               | 0(0)                 |
| Kepon                      | 4                      | 377         | 0(0)                 | 0(0)                 |
| 4-Chloro-3-Methylphenol    | 3                      | 10          | 0(0)                 | 0(0)                 |
| PCB 194                    | 3                      | 316         | 316(100)             | 0(0)                 |
| Pentachloroanisole         | 3                      | 6           | 0(0)                 | 0(0)                 |
| Tebufenozide               | 3                      | 442         | 0(0)                 | 0(0)                 |
| Trans-nonachlor            | 3                      | 0           | 0(0)                 | 0(0)                 |
| 4-Nitrophenol              | 2                      | 78          | 0(0)                 | 0(0)                 |
| Desethylterbutylazine      | 2                      | 39          | 0(0)                 | 0(0)                 |
| Dimethyl phthalate         | 2                      | 167         | 0(0)                 | 0(0)                 |
| Hydroxysimazine            | 2                      | 92          | 0(0)                 | 0(0)                 |
| Iodofenphos                | 2                      | 455         | 453(100)             | 0(0)                 |
| Metsulfuronmethyl          | 2                      | 0           | 0(0)                 | 0(0)                 |
| Nitrilotriacetic acid      | 2                      | 0           | 0(0)                 | 0(0)                 |
| Nitrofen                   | 2                      | 203         | 0(0)                 | 0(0)                 |
| Pyridate                   | 2                      | 562         | 0(0)                 | 0(0)                 |
| Terbufos                   | 2                      | 570         | 570(100)             | 179(31)              |
| 2-Methylphenol             | 1                      | 0           | 0(0)                 | 0(0)                 |
| 2,3-Dimethylphenol         | 1                      | 0           | 0(0)                 | 0(0)                 |
| 2,6-Dichlorophenol         | 1                      | 15          | 0(0)                 | 0(0)                 |
| Dinitro-o-Cresol           | 1                      | 7           | 0(0)                 | 0(0)                 |
| Dinoseb                    | 1                      | 8           | 0(0)                 | 0(0)                 |
| Dipentyl phthalate         | 1                      | 67          | 0(0)                 | 0(0)                 |
| Hexachlorocyclopentadiene  | 1                      | 19          | 19(100)              | 19(100)              |
| m-Xylene                   | 1                      | 14          | 0(0)                 | 0(0)                 |
| Omethoate                  | 1                      | 256         | 256(100)             | 0(0)                 |
| PBDE 28                    | 1                      | 72          | 0(0)                 | 0(0)                 |
| PCB 105                    | 1                      | 0           | 0(0)                 | 0(0)                 |
| PCB 157                    | 1                      | 0           | 0(0)                 | 0(0)                 |
| 1,1,1,3-Tetrachloropropane | 0                      | 153         | 0(0)                 | 0(0)                 |

| Chemical Name             | No. Cases <sup>a</sup> |             |                      |                      |
|---------------------------|------------------------|-------------|----------------------|----------------------|
|                           | Quantified             | Non-Detects | LOQ>CRT <sup>b</sup> | LOQ>ART <sup>b</sup> |
| Fluoranthene              | 976                    | 67          | 67(100)              | 12(18)               |
| 2,3,4,6-Tetrachlorophenol | 0                      | 8           | 0(0)                 | 0(0)                 |
| 2,4,5-Trichlorophenol     | 0                      | 14          | 4(29)                | 0(0)                 |
| 2,4,6-Trinitrotoluene     | 0                      | 13          | 0(0)                 | 0(0)                 |
| 2,5-Dimethylphenol        | 0                      | 1           | 0(0)                 | 0(0)                 |
| 4-Chloro-2-Methylphenol   | 0                      | 3           | 0(0)                 | 0(0)                 |
| 4-Methylphenol            | 0                      | 218         | 0(0)                 | 0(0)                 |
| Acrylonitrile             | 0                      | 1           | 1(100)               | 1(100)               |
| Captan                    | 0                      | 566         | 0(0)                 | 0(0)                 |
| Chlorthiamid              | 0                      | 279         | 0(0)                 | 0(0)                 |
| Dalapon                   | 0                      | 3           | 0(0)                 | 0(0)                 |
| Di-ethyl phthalate        | 0                      | 20          | 0(0)                 | 0(0)                 |
| Ethylenethiourea          | 0                      | 1           | 0(0)                 | 0(0)                 |
| Fezaquin                  | 0                      | 295         | 295(100)             | 0(0)                 |
| p-Xylene                  | 0                      | 25          | 0(0)                 | 0(0)                 |
| Secbumeton                | 0                      | 16          | 0(0)                 | 0(0)                 |
| Thiram                    | 0                      | 53          | 53(100)              | 0(0)                 |

<sup>a</sup> Sites from Spain were omitted, because the LOQ was not considered reliable.

<sup>b</sup> The percentage of sites which had LOQ > ART or LOQ > CRT was calculated as: (No. sites LOQ > ART OR No. sites LOQ > CRT / No. sites non-detects)x100

**Table S3:** Community studies reporting effects from pesticides for the cases exceeding the levels of 1/10 and 1/1,000 of the LC50 values for the analyzed organism groups.

| Threshold     | Chemical group   | MoA <sup>a</sup> | Organism groups       | Total no. of cases | No. (%) of affected cases <sup>d</sup> | LoE <sup>e</sup>       | Source |
|---------------|------------------|------------------|-----------------------|--------------------|----------------------------------------|------------------------|--------|
| 1/10 -10 LC50 | Insecticides     | AChEI            | Fish                  | 22                 | 9 (41)                                 | About as likely as not | (15)   |
|               |                  |                  | Invertebrates         | 97                 | 71 (73)                                | Likely                 | (15)   |
|               |                  |                  | Algae and macrophytes | 25                 | 5 (20)                                 | Unlikely               | (15)   |
|               |                  | SCI              | Fish                  | 15                 | 7 (47)                                 | About as likely as not | (15)   |
|               |                  |                  | Invertebrates         | 99                 | 75 (76)                                | Likely                 | (15)   |
|               |                  |                  | Algae and macrophytes | 23                 | 8 (35)                                 | About as likely as not | (15)   |
|               | Herbicides       | PSI              | Fish                  | 11                 | 4 (36)                                 | About as likely as not | (40)   |
|               |                  |                  | Invertebrates         | 32                 | 16 (50)                                | More likely than not   | (40)   |
|               |                  |                  | Algae and macrophytes | 52                 | 40 (77)                                | Likely                 | (40)   |
|               |                  | GI               | Fish                  | ns <sup>b</sup>    | ns <sup>b</sup>                        | ns <sup>b</sup>        | (40)   |
|               |                  |                  | Invertebrates         | 8                  | 3 (38)                                 | About as likely as not | (40)   |
|               |                  |                  | Algae and macrophytes | 10                 | 3 (30)                                 | About as likely as not | (40)   |
| 1/10-1 LC50   | Pesticides       |                  | Invertebrates         | 8                  | 8 (100)                                | Very likely            | (5)    |
|               |                  |                  | Fish                  | 48 <sup>c</sup>    | 20 (42)                                | About as likely as not |        |
| >1/10 LC50    | Overall chemical |                  | Invertebrates         | 228 <sup>c</sup>   | 162 (71)                               | Likely                 |        |
|               |                  |                  | Algae and macrophytes | 110 <sup>c</sup>   | 56 (51)                                | More likely than not   |        |
| 1/1,000 LC50  | Pesticides       |                  | Invertebrates         | 45                 | 32 (71)                                | Likely                 | (5)    |

<sup>a</sup> Modes of actions groups: Acetylcholinesterase Inhibitor (AChEI) includes organophosphates and carbamates, which interrupt the transmission of nerve impulses by inhibition of the enzyme acetylcholinesterase. Sodium Channel Inhibitor (SCI) includes synthetic pyrethroids, which lead to paralysis by interfering with the sodium channels of the nervous system. Photosynthesis Inhibitors (PSI) includes triazines/triazinones and the urea compounds, which by interfering with the photosynthesis lead to disrupted plant growth. Growth Inhibitors (GI) includes all products that have no direct photosynthesis-inhibiting effects.

<sup>b</sup> ns - No study available

<sup>c</sup> Total number of cases is calculated as the sum of total number of cases for each chemical group and mode of action. For fish and algae: the sum of total no. cases for (i) Insecticides with AChEI, (ii) Insecticides with SCI, (iii) Herbicides with PSI, and (iv) Herbicides with GI. For invertebrates: the sum of total no. of cases for (i) Insecticides with AChEI, (ii) Insecticides with SCI, (iii) Herbicides with PSI, (iv) Herbicides with GI and (v) Pesticides for the level 1/10-1 of the LC50.

<sup>d</sup> Percentage of affected cases is calculated as ((Number of affected cases/Total number of cases)x100). Effects for the micro-/mesocosm reviews (15, 40) ranged from slight, short-term (less than 8 weeks) effects, to pronounced, long-term (longer than 8 weeks) effects. All cases exhibiting at least slight acute effects for concentrations higher than the 1/10 of the LC50 were considered as affected cases. The exposure range was between 1/10 and 10 times the LC50 values. For the meta-analysis on the effects of pesticides on invertebrate communities (5) all sites exhibiting a statistically significant decline in the abundance of the sensitive invertebrate species when compared with both thresholds levels (1/10- of the LC50 and 1/1,000-1/10 of the LC50) were considered as affected cases.

<sup>e</sup> Likelihood of effects classified based on the affected cases and divided into (i) unlikely (<33 %), (ii) more likely than not (>50 %), (iii) About as likely as not (33-66 %), (iv) likely (>66%) and (v) very likely (>90 %). Terminology is based on the guidelines for uncertainty treatment, which is used from the intergovernmental panel on climate change (41).

**Table S4:** Number of sites for which the chemical concentration exceeds the CRT (chronic risk threshold) and the ART (acute risk threshold) for each organism group represented by the fish *P. promelas* (PP), the invertebrate *D. magna* (DM), and the algae *P. subcapitata* (PS).

| Chemical                   | Concentration exceeding ART/CRT (Type of data) <sup>a</sup> |              |              |
|----------------------------|-------------------------------------------------------------|--------------|--------------|
|                            | No. sites PP                                                | No. sites DM | No. sites PS |
| 4,4'- DDE                  | 8/9(P/1)                                                    | 9/21(P/4)    | 8/8(P/1)     |
| 4,4'- DDT                  | 7/8(E)                                                      | 10/52(E)     | -            |
| 2,4,6-tri-tert-Butylphenol | 5/9(E)                                                      | 3/17(P/4)    | -            |
| Hexachlorobenzene          | 4/4(P/2)                                                    | 9/44(E)      | 5/4(E)       |
| 4,4'- DDD                  | 4/4(P/1)                                                    | 9/24(E)      | 3/1(P/2)     |
| B-Hexachlorocyclohexane    | 3/3(P/4)                                                    | 0/3(P/4)     | 0/0(B)       |
| Endrin                     | 26/71(E)                                                    | 0/1(E)       | 0/0(P/2)     |
| g-Hexachlorocyclohexane    | 20/51(E)                                                    | 0/38(E)      | 0/0(B)       |
| Atrazine                   | 2/3(E)                                                      | 0/7(E)       | 72/73(E)     |
| Endosulfan                 | 2/17(E)                                                     | 0/0(E)       | 0/0(E)       |
| Tributyltin                | 15/21(E)                                                    | 15/363(E)    | 15/18(E)     |
| Cyanide                    | 13/22(E)                                                    | 3/82(E)      | -            |
| Ziram                      | 11/20(E)                                                    | 1/24(E)      | 1/2(E)       |
| Benzo[a]pyrene             | 1/9(E)                                                      | 12/759(E)    | 1/1(E)       |
| Hexachlorobutadiene        | 1/7(E)                                                      | 0/7(E)       | 1/0(P/2)     |
| PCB 194                    | 1/2(E)                                                      | 1/3(E)       | -            |
| Endosulfan I               | 1/17(E)                                                     | 0/1(P/4)     | 1/1(P/2)     |
| Aldrin                     | 1/1(E)                                                      | 1/5(E)       | 1/1(P/3)     |
| Chlordane                  | 1/1(E)                                                      | 1/1(E)       | -            |
| Hexachlorocyclohexane      | 1/1(E)                                                      | 0/1(P/4)     | 0/0(B)       |
| Hexachlorocyclopentadiene  | 1/1(E)                                                      | 1/1(E)       | 1/1(P/4)     |
| Dichloromethane            | 1/0(E)                                                      | 1/1(E)       | 0/0(B)       |
| Pentachlorophenol          | 0/6(P/4)                                                    | 0/7(E)       | 0/0(E)       |
| PCB 180                    | 0/2(P/3)                                                    | 0/3(P/4)     | -            |
| 2-naphthalenol             | 0/2(E)                                                      | 0/6(E)       | 0/0(E)       |
| 4-Nonylphenol              | 0/1(E)                                                      | 0/5(E)       | 0/0(E)       |
| Chlorpyrifos               | 0/1(E)                                                      | 146/235(E)   | 0/0(P/3)     |
| Methoxychlor               | 0/1(E)                                                      | 0/1(E)       | 0/0(P/1)     |
| PCB 153                    | 0/1(E)                                                      | 0/4(E)       | -            |
| Permethrin                 | 0/1(E)                                                      | 13/27(E)     | -            |
| Pyrene                     | 0/1(E)                                                      | 0/15(E)      | -            |
| 1,2,3-Trichlorbenzene      | 0/0(P/4)                                                    | 0/1(E)       | 0/0(E)       |
| 2,4'-DDT                   | 0/0(P/3)                                                    | 0/21(P/4)    | -            |
| 4-Octylphenol              | 0/0(P/3)                                                    | 0/1(P/4)     | 0/0(P/3)     |
| Anthracene                 | 0/0(P/3)                                                    | 0/6(E)       | 0/0(P/3)     |
| Dipentyl phthalate         | 0/0(P/3)                                                    | 0/1(P/4)     | 0/0(P/3)     |
| Phenanthrene               | 0/0(P/3)                                                    | 0/5(E)       | 0/0(E)       |
| 2,4'-DDD                   | 0/0(P/1)                                                    | 0/8(P/4)     | 0/0(B)       |



| Chemical                | Concentration exceeding ART/CRT (Type of data) <sup>a</sup> |              |              |
|-------------------------|-------------------------------------------------------------|--------------|--------------|
|                         | No. sites PP                                                | No. sites DM | No. sites PS |
| Chlorfenvinfos          | 0/0(P/1)                                                    | 69/112(E)    | 0/0(B)       |
| Demeton-S-Methyl        | 0/0(P/1)                                                    | 0/9(E)       | 0/0(B)       |
| Dibutyltin              | 0/0(P/1)                                                    | 0/12(E)      | 0/0(P/3)     |
| Iodofenphos             | 0/0(P/1)                                                    | 0/1(E)       | -            |
| Isoproturon             | 0/0(P/1)                                                    | 0/12(E)      | 25/51(E)     |
| Lenacil                 | 0/0(P/1)                                                    | 0/0(E)       | 1/3(E)       |
| Linuron                 | 0/0(P/1)                                                    | 0/1(E)       | 2/1(E)       |
| Metazachlor             | 0/0(P/1)                                                    | 0/0(E)       | 1/6(E)       |
| Pendimethalin           | 0/0(P/1)                                                    | 0/0(E)       | 1/1(E)       |
| Terbutylazine           | 0/0(P/1)                                                    | 0/0(E)       | 24/31(E)     |
| 4-Nonylphenol, branched | 0/0(E)                                                      | 0/1(P/4)     | 0/0(E)       |
| Alachlor                | 0/0(E)                                                      | 0/0(E)       | 10/14(E)     |
| Bromacil                | 0/0(E)                                                      | 0/0(E)       | 1/1(E)       |
| Butyl benzyl phthalate  | 0/0(E)                                                      | 0/1(E)       | 0/1(E)       |
| Carbofuran              | 0/0(E)                                                      | 11/114(E)    | 0/0(E)       |
| Di-(n-butyl) phthalate  | 0/0(E)                                                      | 0/1(E)       | 0/0(E)       |
| Dichlorvos              | 0/0(E)                                                      | 21/56(E)     | 0/0(E)       |
| Diuron                  | 0/0(E)                                                      | 0/0(E)       | 230/345(E)   |
| Heptachlor              | 0/0(E)                                                      | 0/8(E)       | 0/0(E)       |
| Malathion               | 0/0(E)                                                      | 7/29(E)      | 0/0(E)       |
| Methomyl                | 0/0(E)                                                      | 1/3(E)       | 0/0(E)       |
| Methyl parathion        | 0/0(E)                                                      | 0/17(E)      | 0/0(E)       |
| Metolachlor             | 0/0(E)                                                      | 0/0(E)       | 2/7(E)       |
| Para-tert-octylphenol   | 0/0(E)                                                      | 0/23(E)      | 0/0(P/4)     |
| Parathion-ethyl         | 0/0(E)                                                      | 1/22(E)      | 0/0(P/2)     |
| PCB 52                  | 0/0(E)                                                      | 0/1(E)       | -            |
| Pentachloroanisole      | 0/0(E)                                                      | 0/1(E)       | 0/0(P/3)     |
| Phenitrothion           | 0/0(E)                                                      | 1/12(E)      | 0/0(E)       |
| Phosalone               | 0/0(E)                                                      | 0/8(E)       | 0/0(E)       |
| Pirimicarb              | 0/0(E)                                                      | 0/4(E)       | 0/0(E)       |
| Terbufos                | 0/0(E)                                                      | 2/2(E)       | 0/0(B)       |
| Toluene                 | 0/0(E)                                                      | 0/1(E)       | 0/0(E)       |
| Trichloromethane        | 0/0(E)                                                      | 0/2(E)       | 0/0(B)       |
| Benz[a]anthracene       | -                                                           | 0/9(E)       | -            |
| Fluoranthene            | -                                                           | 4/30(E)      | -            |
| Omethoate               | -                                                           | 0/1(E)       | -            |
| Pentabromoethylbenzene  | -                                                           | 11/31(P/4)   | -            |

<sup>a</sup> Type of data: **E**: Experimental toxicity data from literature, **B**: Baseline toxicity data estimated from the octanol/water partitioning coefficient, **P**: Predicted toxicity data from read across together with the level of reliability (1: low ; 2: moderate ; 3: high and 4: very high). Toxicity values were removed when they lay outside of the model domain ( $1 < \log K_{ow} < 6$ ) for the baseline prediction (**D**), or when they exceed water solubility by a factor of 10 (**WS**).

**Table S5:** Number of sites monitored for each river basin (RB) and number of sites with land use (LU) for each river basin.

| River basin                   | Area(km <sup>2</sup> ) | No sites |     | River basin               | Area(km <sup>2</sup> ) | No sites |    |
|-------------------------------|------------------------|----------|-----|---------------------------|------------------------|----------|----|
|                               |                        | RB       | LU  |                           |                        | RB       | LU |
| Danube                        | 803554                 | 569      | 343 | Sicily                    | 25684                  | 10       | -  |
| Loire                         | 156765                 | 388      | 37  | Northumbria               | 8499                   | 9        | -  |
| Rhone                         | 128355                 | 360      | 103 | UK South East             | 8288                   | 9        | -  |
| Po Basin                      | 73341                  | 279      | -   | Schlei/Trave              | 6154                   | 8        | -  |
| Adour-Garonne                 | 116740                 | 247      | 52  | Venta                     | 21915                  | 8        | -  |
| Seine                         | 94356                  | 206      | 19  | Cavado, Ave and Leca      | 3358                   | 7        | -  |
| Middle Appenines              | 36192                  | 193      | -   | Andalusia Atlantic Basins | 68010                  | 6        | -  |
| Rhine                         | 186325                 | 168      | 32  | East Aegean               | 60875                  | 6        | -  |
| Northern Appenines            | 38477                  | 149      | -   | Galician Coast            | 13081                  | 6        | -  |
| Internal Basins of Catalonia  | 16433                  | 106      | -   | Kokemäenjoki              | 68628                  | 6        | -  |
| Ebro                          | 86012                  | 84       | 1   | Lielupe                   | 17800                  | 6        | -  |
| Minho and Lima                | 40829                  | 75       | -   | Warnow/Peene              | 13631                  | 6        | -  |
| Elbe                          | 147527                 | 73       | 1   | Algarve Basins            | 3836                   | 5        | -  |
| Eastern Alps                  | 37179                  | 70       | -   | Daugava                   | 82793                  | 5        | -  |
| Scheldt                       | 36904                  | 65       | 12  | Ems                       | 16315                  | 5        | -  |
| Douro                         | 97713                  | 60       | -   | Central Macedonia         | 31811                  | 4        | -  |
| Meuse                         | 34238                  | 58       | 9   | Guadiana                  | 66989                  | 4        | -  |
| GB North Western              | 12375                  | 53       | -   | Kymijoki-Gulf of Finland  | 50867                  | 4        | -  |
| Scotland                      | 67803                  | 47       | -   | Vidaa-Krusaa              | 5718                   | 4        | -  |
| Tagus and Western Basins      | 83120                  | 42       | -   | Vistula                   | 206058                 | 4        | -  |
| Jucar                         | 42959                  | 41       | -   | Black Sea                 | 20974                  | 3        | -  |
| Shannon                       | 18317                  | 41       | -   | Eastern Sterea Ellada     | 12201                  | 3        | -  |
| Andalusia                     | 17958                  | 35       | -   | North Adriatic            | 3852                   | 3        | -  |
| Southern Appenines            | 67496                  | 32       | -   | SE South West             | 29032                  | 3        | -  |
| Neagh Bann                    | 7920                   | 30       | -   | NO West Bay               | 37529                  | 3        | -  |
| Basque County internal basins | 2267                   | 29       | -   | Western Macedonia         | 19761                  | 3        | -  |
| IE South Eastern              | 12859                  | 29       | -   | Dee                       | 2142                   | 2        | -  |
| IE Western                    | 12220                  | 28       | -   | Gauja                     | 14381                  | 2        | -  |
| IE South Western              | 11363                  | 27       | -   | Vouga, Mondego and Lis    | 11596                  | 2        | -  |
| UK South West                 | 17631                  | 27       | -   | Eastern Peloponnese       | 8408                   | 1        | -  |
| Corsica                       | 8694                   | 22       | 8   | Epirus                    | 15294                  | 1        | -  |
| Cyprus                        | 9248                   | 22       | -   | Finnmark                  | 48528                  | 1        | -  |
| UK North Eastern              | 3067                   | 17       | -   | Glomma                    | 47429                  | 1        | -  |
| Western Wales                 | 12213                  | 17       | -   | Nordland                  | 38369                  | 1        | -  |
| Humber                        | 25415                  | 16       | -   | Northern Peloponnese      | 7383                   | 1        | -  |
| Weser                         | 47291                  | 16       | -   | Oulujoki-Iijoki           | 64731                  | 1        | -  |
| IE Eastern                    | 6275                   | 14       | -   | Sado and Mira             | 10072                  | 1        | -  |
| Segura                        | 18905                  | 13       | -   | Skagerrak and Kattegat    | 75986                  | 1        | -  |
| Severn                        | 21068                  | 13       | -   | South Baltic              | 54753                  | 1        | -  |
| Ucker                         | 134390                 | 13       | -   | Thessalia                 | 13133                  | 1        | -  |
| UK North West                 | 11370                  | 12       | -   | Troendelag                | 35297                  | 1        | -  |
| Anglian                       | 25093                  | 11       | -   | Vuoksi                    | 283356                 | 1        | -  |
| Solway Tweed                  | 15218                  | 11       | -   | NO West                   | 32815                  | 1        | -  |
| Thames                        | 15811                  | 11       | -   | West Aegean               | 21584                  | 1        | -  |
| Nemunas                       | 100082                 | 10       | -   | Western Peloponnese       | 7235                   | 1        | -  |
| Serchio                       | 1439                   | 10       | -   |                           |                        |          |    |

**Table S6:** Land use type and their respective categories.

| <b>Category</b>                    | <b>Type of land use</b>                                                                                |
|------------------------------------|--------------------------------------------------------------------------------------------------------|
| Natural vegetation                 | Scrub and/or herbaceous vegetation areas<br>Open spaces with little or no vegetation<br>Forested areas |
| Anthropogenically influenced areas | Arable land<br>Permanent crops<br>Heterogeneous agricultural areas<br>Urban areas                      |

**Table S7:** Number of sites with ecological and chemical information. Thresholds comprise chronic risk threshold (CRT) and acute risk threshold (ART). Number of sites exceeding the risk thresholds, number of sites in high (H) and good (G) status which exceed the risk thresholds, as well as the total number of sites analyzed are given for each organism group.

| <b>Species</b> | <b>Threshold Classes</b> | <b>No. of sites</b> |                        |              |
|----------------|--------------------------|---------------------|------------------------|--------------|
|                |                          | <b>Exceeding</b>    | <b>Exceeding (H+G)</b> | <b>Total</b> |
| Fish           | >CRT                     | 87                  | 50                     |              |
|                | CRT-ART                  | 3                   | 1                      |              |
|                | <ART                     | 5                   | 1                      | <b>95</b>    |
| Invertebrates  | >CRT                     | 15                  | 8                      |              |
|                | CRT-ART                  | 155                 | 67                     |              |
|                | <ART                     | 21                  | 5                      | <b>191</b>   |
| Diatoms        | >CRT                     | 87                  | 53                     |              |
|                | CRT-ART                  | 17                  | 11                     |              |
|                | <ART                     | 32                  | 19                     | <b>136</b>   |

## SI References

1. European Environmental Agency (2012) Waterbase - Rivers, vs.12. Available at: <http://www.eea.europa.eu/data-and-maps/data/waterbase-rivers-9> Accessed August 20, 2012.
2. European Environmental Agency (2012) Quality control document. Waterbase - Rivers, vs. 12. Available at: <http://www.eea.europa.eu/data-and-maps/data/waterbase-rivers-9> Accessed August 20, 2012.
3. Commission of the European Community (2000) Directive 2000/60/EC of the European Parliament and of the Council establishing a framework for the Community action in the field of water policy. *Off J Eur Union L* 327, pp.1-73.
4. European Environmental Agency. (2012) Catchments and Rivers Network System (ECRINS) vs 1.1: Rationales, building and improving for widening uses to Water Accounts and WISE applications. EEA Technical report No 7/2012. Available at: <http://www.eea.europa.eu/highlights/data-and-maps/data/european-catchments-and-rivers-network> Accessed August 20, 2012.
5. Schäfer RB, *et al.* (2012) Thresholds for the effects of pesticides on invertebrate communities and leaf breakdown in stream ecosystems. *Environ Sci Technol* 46(9):5134-5142.
6. Schäfer RB, *et al.* (2013) How to characterize chemical exposure to predict ecologic effects on aquatic communities? *Environ Sci Technol* 47(14):7996–8004.
7. Schulz R & Liess M (2000) Toxicity of fenvalerate to caddisfly larvae: chronic effects of 1-vs 10-h pulse-exposure with constant doses. *Chemosphere* 41(10):1511-1517.
8. Lepom P, *et al.* (2009) Needs for reliable analytical methods for monitoring chemical pollutants in surface water under the European Water Framework Directive. *J Chromatogr* 1216(3):302-315.
9. von der Ohe PC, *et al.* (2011) A new risk assessment approach for the prioritization of 500 classical and emerging organic microcontaminants as potential river basin specific pollutants under the European Water Framework Directive. *Sci Total Environ* 409(11):2064-2077.
10. Schüürmann G, Ebert R-U, & Kühne R (2011) Quantitative Read-Across for Predicting the Acute Fish Toxicity of Organic Compounds. *Environ Sci Technol* 45(10):4616-4622.
11. Kühne R, *et al.* (2013) Read - Across Prediction of the Acute Toxicity of Organic Compounds toward the Water Flea *Daphnia magna*. *Mol. Inform.* 32(1):108-120.
12. ChemProp (2014) Chemical Properties Estimation Software System 6.1. UFZ Department of Ecological Chemistry. Available at: <http://www.ufz.de/index.php?en=6738> Accessed March 15, 2014.
13. Altenburger R, Walter H, & Grote M (2004) What contributes to the combined effect of a complex mixture? *Environ Sci Technol* 38(23):6353-6362.
14. Schäfer RB, von der Ohe PC, Kühne R, Schüürmann G, & Liess M (2011) Occurrence and toxicity of 331 organic pollutants in large rivers of north Germany over a decade (1994 to 2004). *Environ Sci Technol* 45(14):6167-6174.
15. Van Wijngaarden RPA, Brock TCM, & Van den Brink PJ (2005) Threshold levels for effects of insecticides in freshwater ecosystems: a review. *Ecotoxicology* 14(3):355-380.
16. Beketov MA, Kefford BJ, Schäfer RB, & Liess M (2013) Pesticides reduce regional biodiversity of stream invertebrates. *Proc Natl Acad Sci USA* 110(27):11039-11043.

17. Ahlers J, *et al.* (2006) Acute to chronic ratios in aquatic toxicity—variation across trophic levels and relationship with chemical structure. *Environ Toxicol Chem* 25(11):2937-2945.
18. Heger W, Jung S-J, Martin S, & Peter H (1995) Acute and prolonged toxicity to aquatic organisms of new and existing chemicals and pesticides: 1. Variability of the acute to prolonged ratio 2. Relation to logPow and water solubility. *Chemosphere* 31(2):2707-2726.
19. Länge R, Hutchinson TH, Scholz N, & Solbe J (1998) Analysis of the ECETOC aquatic toxicity (EAT) database II—Comparison of acute to chronic ratios for various aquatic organisms and chemical substances. *Chemosphere* 36(1):115-127.
20. Mayo-Bean K, Moran K, Meylan B, & Ranslow P (2012) Methodology document for ECOlogical Structure-Activity Relationship Model (ECOSAR). Risk Assessment Division of the Office of Pollution Prevention and Toxics, U.S. Environmental Protection Agency (EPA/OPPT). Available at: <http://www.epa.gov/oppt/newchems/tools/21ecosar.htm> Accessed October 20, 2013.
21. Duboudin C, Ciffroy P, & Magaud H (2004) Acute - to - chronic species sensitivity distribution extrapolation. *Environ Toxicol Chem* 23(7):1774-1785.
22. Fleeger JW, Carman KR, & Nisbet RM (2003) Indirect effects of contaminants in aquatic ecosystems. *Sci Total Environ* 317(1):207-233.
23. Stark JD, Banks JE, & Vargas R (2004) How risky is risk assessment: the role that life history strategies play in susceptibility of species to stress. *Proc Natl Acad Sci USA* 101(3):732-736.
24. Relyea R & Hoverman J (2006) Assessing the ecology in ecotoxicology: a review and synthesis in freshwater systems. *Ecol Lett* 9(10):1157-1171.
25. Köhler H-R & Triebskorn R (2013) Wildlife Ecotoxicology of Pesticides: Can We Track Effects to the Population Level and Beyond? *Science* 341(6147):759-765.
26. Parkerton TF & Konkel WJ (2000) Application of quantitative structure-activity relationships for assessing the aquatic toxicity of phthalate esters. *Ecotoxicol Environ Saf* 45(1):61-78.
27. Oehlmann J, Oetken M, & Schulte-Oehlmann U (2008) A critical evaluation of the environmental risk assessment for plasticizers in the freshwater environment in Europe, with special emphasis on Bisphenol A and endocrine disruption. *Environ Res* 108(2):140-149.
28. European Chemicals Bureau (2008) European Union Risk Assessment Report for bis(2-ethylhexyl) phthalate (DEHP). Office for Official Publications of the European Communities, Luxembourg. Available at: <http://echa.europa.eu/documents/10162/e614617d-58e7-42d9-b7fb-d7bab8f26feb> Accessed March 30, 2014.
29. Adams WJ & Heidolph BB (1985) Short-cut chronic toxicity estimates using *Daphnia magna*, in *Aquatic Toxicology and Hazard Assessment: 7th Symposium*. ASTM STP, pp 87-103.
30. Planelló R, Herrero O, Martínez-Guitarte JL, & Morcillo G (2011) Comparative effects of butyl benzyl phthalate (BBP) and di (2-ethylhexyl) phthalate (DEHP) on the aquatic larvae of *Chironomus riparius* based on gene expression assays related to the endocrine system, the stress response and ribosomes. *Aquat Toxicol* 105(1):62-70.
31. Carnevali O, *et al.* (2010) DEHP impairs zebrafish reproduction by affecting critical factors in oogenesis. *PLoS One* 5(4):e10201.

32. US Environmental Protection Agency (USEPA) (2007) ECOTOX User Guide: ECOTOXicology Database System, vs 4.0. Washington, DC. Available at: <http://www.epa.gov/ecotox> Accessed March 10, 2014.
33. Aruoja V, Moosus M, Kahru A, Sihtmäe M, & Maran U (2014) Measurement of baseline toxicity and QSAR analysis of 50 non-polar and 58 polar narcotic chemicals for the alga *Pseudokirchneriella subcapitata*. *Chemosphere* 96:23-32.
34. US Environmental Protection Agency (USEPA) (2012) Fathead minnow database. Available at: <http://www.epa.gov/> Accessed March 10, 2014.
35. The Pesticide Properties DataBase (PPDB) (2013) Agriculture & Environment Research Unit (AERU). University of Hertfordshire. Available at: <http://sitem.herts.ac.uk/aeru/ppdb/en/index.htm> Accessed May 30, 2014.
36. von der Ohe PC, *et al.* (2005) Structural Alerts: A New Classification Model to Discriminate Excess Toxicity from Narcotic Effect Levels of Organic Compounds in the Acute Daphnid Assay. *Chem Res Toxicol* 18(3):536-555.
37. Tomlin C (2006) The pesticides manual: A world compendium, in *British Crop Protection Council*, pp 351.
38. Oris JT & Giesy Jr JP (1987) The photo-induced toxicity of polycyclic aromatic hydrocarbons to the larvae of the Fathead Minnow (*Pimephales promelas*). *Chemosphere* 16(7):1395-1404.
39. International Programme on Chemical Safety (2008) Screening Information Data Set (SIDS) for High Production Volume Chemicals. Available at: <http://www.inchem.org/pages/sids.html> Accessed October 22, 2013.
40. Brock T, Lahr J, & Brink P (2000) Ecological risks of pesticides in freshwater ecosystems. Part 1. Herbicides. *Alterra-rapport*.
41. Mastrandrea M, *et al.* (2010) Guidance note for lead authors of the IPCC fifth assessment report on consistent treatment of uncertainties. Intergovernmental Panel on Climate Change (IPCC). Available at: <http://www.ipcc.ch/pdf/supporting-material/uncertainty-guidance-note.pdf>. Accessed October 18, 2012.
